1 **Title: Single-cell immune multi-omics and repertoire analyses in pancreatic ductal adenocarcinoma**  
2 **reveal differential immunosuppressive mechanisms within different tumour microenvironments**

3  
4 Shivan Sivakumar<sup>\*1,2,3</sup>, Ashwin Jainarayanan<sup>\*2,4</sup>, Edward Arbe-Barnes<sup>\*5</sup>, Piyush Kumar Sharma<sup>+1</sup>, Maire  
5 Ni Leathlobhair<sup>+6,7</sup>, Sakina Amin<sup>+8</sup>, Lara Heij<sup>9,10</sup>, Samarth Hegde<sup>11</sup>, Assaf Magen<sup>11</sup>, Felicia Tucci<sup>8,12,13</sup>, Bo  
6 Sun<sup>14</sup>, Shihong Wu<sup>8,12</sup>, Nithishwer Mouroug Anand<sup>8</sup>, Hubert Slawinski<sup>13</sup>, Santiago Revale<sup>13</sup>, Isar  
7 Nassiri<sup>13</sup>, Jonathon Webber<sup>2</sup>, Adam Frampton<sup>15,16,17,18</sup>, Georg Wiltberger<sup>19</sup>, Ulf Neumann<sup>20</sup>, Philip  
8 Charlton<sup>1</sup>, Laura Spiers<sup>1</sup>, Tim Elliott<sup>21</sup>, Pallavur V. Sivakumar<sup>22</sup>, Alexander V. Ratushny<sup>22</sup>, Mark  
9 Middleton<sup>1</sup>, Dimitra Peppas<sup>23,24</sup>, Benjamin Fairfax<sup>1</sup>, Miriam Merad<sup>11</sup>, Michael L. Dustin<sup>2,25§</sup>, Enas Abu-  
10 Shah<sup>2,26§</sup>, Rachael Bashford-Rogers<sup>8,12,13§</sup>

11  
12 \* denotes joint first authors, + denotes joint second authors and § denotes joint last authors.

13  
1 Department of Oncology, University of Oxford, Oxford, OX3 7LF, UK

2 Kennedy Institute of Rheumatology, Nuffield Department of Orthopaedics, Rheumatology and  
Musculoskeletal Sciences, University of Oxford, Roosevelt Dr, Headington, Oxford OX3 7FY, UK

3 University of Birmingham and University hospitals of Birmingham NHS Trust, Birmingham, B15 2TT, UK

4 Institute of Developmental and Regenerative Medicine (IDRM), Old Road Campus, Old Rd, Roosevelt Dr,  
Headington, University of Oxford, Oxford OX3 7TY, UK

5 Oxford University Clinical Academic Graduate School, John Radcliffe Hospital, University of Oxford,  
Oxford, OX3 9DU, UK

6 Department of Microbiology, Trinity College, Dublin, Ireland

7 Oxford Big Data Institute, Old Road Campus, University of Oxford, OX3 7LF, UK

8 Department of Biochemistry, South Parks Road, University of Oxford, Oxford, OX1 3QU, UK

9 GROW School for Oncology and Developmental Biology, Department of Pathology, Maastricht  
University Medical Center, Maastricht, The Netherlands.

10 Department of Surgery and Transplantation, University Hospital RWTH Aachen, Aachen, Germany

11 Precision Immunology Institute, Icahn School of Medicine at Mount Sinai, 1 Gustave L. Levy Pl, New  
York, NY 10029, United States

12 Oxford Cancer Centre, Oxford, UK

13 Wellcome Centre for Human Genetics, University of Oxford, Oxford, UK

14 Nuffield Department of Clinical Neurosciences, University of Oxford, Oxford OX3 7LD, UK

15 Minimal Access Therapy Training Unit (MATTU), Leggett Building, University of Surrey, Daphne Jackson  
Road, Guildford GU2 7WG, UK

16 Department of Hepato-Pancreato-Biliary (HPB) Surgery, Royal Surrey County Hospital, Egerton Road,  
Guildford GU2 7XX, UK

17 Targeted Cancer Therapy Unit, Department of Clinical and Experimental Medicine, Faculty of Health  
and Medical Science, University of Surrey, Guildford GU2 7WG, UK

18 Division of Cancer, Department of Surgery and Cancer, Imperial College London, Hammersmith Hospital  
Campus, London W12 0NN, UK

19 Department of General, Visceral, and Transplantation Surgery, University Hospital of RWTH Aachen,  
Aachen, Germany

20 Department of General, Visceral, and Transplantation Surgery, University Hospital of RWTH Aachen,  
Aachen, Germany; Department of Surgery, Maastricht University Medical Center (MUMC), Maastricht,  
the Netherlands

21 Centre for Immuno-oncology, Nuffield Department of Medicine, University of Oxford, Oxford, UK

22 Bristol-Myers Squibb, Summit, NJ, USA

23 Nuffield Department of Medicine, Old Road Campus, University of Oxford, Oxford OX3 7BN, UK

24 UCL Institute of Immunity & Transplantation, The Pears Building, Pond Street, London NW3 2PP, UK

25 Chinese Academy of Medical Sciences Oxford Institute, Nuffield Department of Medicine, University of Oxford, Oxford, OX3 7BN, UK

26 Sir William Dunn School of Pathology, South Parks Road, University of Oxford, Oxford, OX1 3RE, UK

14

15 **Corresponding authors:** Shivan Sivakumar ([s.sivakumar@bham.ac.uk](mailto:s.sivakumar@bham.ac.uk)), Enas Abu-Shah  
16 ([enas.abushah@path.ox.ac.uk](mailto:enas.abushah@path.ox.ac.uk)) and Rachael Bashford-Rogers ([rachael.bashford-  
18 rogers@bioch.ox.ac.uk](mailto:rachael.bashford-<br/>17 rogers@bioch.ox.ac.uk)).

18

19

20

## 21 **Abstract**

22 Pancreatic ductal adenocarcinoma (PDAC) has an extremely poor prognosis. Understanding the  
23 multiple mechanisms by which the tumour evades immune control, and how these mechanisms may  
24 be disrupted is critical to developing targeted immunotherapies. Previous studies have shown that  
25 higher lymphocyte infiltration is associated with better survival, and here we investigated what  
26 mediates these differences. We performed a comprehensive analysis of PDAC-associated immune  
27 cells using single cell multi-omics coupled with re-analysis of public PDAC scRNA-seq datasets. We  
28 introduce novel single-cell and repertoire analyses that have uncoupled diverse roles and  
29 contributions of various immune cell populations within different tumour microenvironments (TMEs).  
30 They revealed clear distinctions in the clonal characteristics among different patient groups, provided  
31 valuable insights into the mechanisms of immune cell migration and tissue adaptation underlying  
32 these disparities. These results point to differential CD4 polarisation of intra-tumoural T cells,  
33 differential B cell differentiation, GC reactions, antigen presentation pathways, and distinct cell-cell  
34 communication between the myeloid-enriched and adaptive-enriched groups. Overall, we identified  
35 two major distinct themes for future immune intervention within PDAC patients between those with  
36 higher adaptive versus myeloid immune cell infiltration.

## 37 **Introduction**

38 Pancreatic ductal adenocarcinoma has the worst survival of any common human cancer, with a 5-year  
39 survival of below 10%<sup>1</sup>. The mainstay of treatment is chemotherapy, however, approximately 15% of  
40 patients benefit from surgical resection, which can potentially provide cure in a subset of those  
41 patients. Despite the introduction of immunotherapy, the benefit in PDAC is minimal<sup>2-6</sup>, and so there  
42 is an unmet need to develop better treatments for patient benefit.

43  
44  
45 Previous work from our group and others has suggested that there is a sizable immune infiltrate in  
46 these tumours and understanding the nature of this infiltrate is critical for developing pragmatic  
47 immunotherapy strategies for PDAC<sup>7-10</sup>. We have previously shown that patients with high tumour  
48 lymphocyte infiltration at resection have a better prognosis than those that do not<sup>8</sup>. Furthermore,  
49 after characterising tumour infiltrating lymphocytes (TILs) in PDAC, we see that even though there is  
50 limited exhaustion in a subset of CD8 T cells, we observed that a significant number of CD4 and CD8 T  
51 cells were senescent<sup>7,8</sup>. Additionally, we see a activated Treg expressing checkpoints TIGIT, ICOS,  
52 CTLA4 and CD39<sup>7,9</sup> suggesting a strongly immunosuppressive microenvironment. This activation was  
53 determined by the high expression of the checkpoints TIGIT, ICOS, CTLA4 and CD39<sup>7,9</sup>.

54  
55 Other groups have made recent observations regarding the intra-tumoural immune infiltrate<sup>11</sup>. Peng  
56 et al. did the first large scale single cell analysis of PDAC and demonstrated that there was a complex  
57 immune infiltrate, and they highlighted that T cells were the dominant immune cell in the TME<sup>10</sup>.  
58 Steele et al. performed a second large single cell experiment and demonstrated that the predominant  
59 CD8 T cell exhaustion marker was TIGIT<sup>12</sup>. Schlack et al, have performed single cell sequencing with  
60 TCR sequencing. They have identified a heterogeneous lymphocyte infiltrate and trajectory analysis  
61 demonstrated similarities between inhibitory and dysfunctional populations<sup>13</sup>. Brouwer et al had  
62 undertaken a single cell CyTOF analysis using a 41-marker panel focused on infiltrating lymphocytes.  
63 They found low levels of tissue resident cytotoxic CD8 T cells and they concurrently have low levels of  
64 PD1. Interestingly, the group has also found high levels of activated Tregs and B cells<sup>14</sup>. Liudahl et al.  
65 used an immune focused multiplex IHC panel to evaluate leukocyte populations in a cohort of 135  
66 PDAC patient samples. They demonstrated that the T cell to CD68 ratio is important in the treatment  
67 naive setting to demonstrate prognostic benefit<sup>15</sup>.

68  
69 There is a growing body of evidence describing a distinction between lymphocyte- and myeloid-  
70 enriched tumours and understanding what is driving this is critical to therapeutic interventions.  
71 Despite the growing number of datasets aiming at defining the nature of the different immune subsets

72 within PDAC TME, we still lack an understanding of the clonal evolution and differentiation pathways  
73 driving these populations. PDAC has been traditionally considered to have a low mutation rate,  
74 suggesting a low prevalence of antigens to stimulate the immune response. However, seeing the  
75 presence of activated and exhausted cells within the TME, and associations between cytotoxic CD8 T  
76 cells, B cells and neoantigen quality with patient survival<sup>16,17</sup> suggests the presence of specific stimuli  
77 and warrants the investigation of the clonal distribution and evolution of both T and B cells. Multiple  
78 previous studies have shown that higher adaptive immune cell infiltration is associated with marginally  
79 better survival<sup>8,18</sup>, however, both adaptive and myeloid enriched PDAC patients have dismal  
80 prognosis<sup>6</sup>. This study's objective is to elucidate the distinctive features of adaptive immune responses  
81 in patients' tumours with high levels of adaptive and myeloid cell populations and to identify the  
82 specific immune suppression pathways that set apart the myeloid-high and adaptive-high patient  
83 groups. These insights will help in patient stratification and the development of personalised  
84 therapeutic approaches. Furthermore, the nature of B and T cells moving between the tumour and  
85 draining lymph nodes is important for mounting effective anti-tumoural immune responses and  
86 establishing long-term systemic memory<sup>19</sup>. However, the signals responsible for B and T cell tumour  
87 infiltration, retention and egress, such as adhesion and chemokine milieu, are unknown. We aimed to  
88 explore the nature and determinants of B and T cell immunosurveillance in PDAC to identify pathways  
89 that can be targeted to improve immune cell trafficking.

90  
91 To this end, we performed the largest and most comprehensive analysis of PDAC-associated  
92 lymphocytes from tumour and blood to date using single cell multi-omics analysis coupled with the  
93 re-analysis of public PDAC scRNA-seq datasets<sup>10,12</sup>. Importantly, we developed and applied novel single  
94 cell analyses to uncouple the distinct roles and contributions different immune cell populations, the  
95 clonal nature across patient groups, the nature of immune cell migration and tissue adaptation, and  
96 provided insights into key pathways defining these differences. This study lays the foundation for  
97 understanding why immunotherapy has so far not been successful in PDAC, and provides an avenue  
98 for identifying novel therapeutic targets based on an enhanced understanding of the patients' intra-  
99 tumoural immune composition.

100  
101  
102  
103  
104  
105

## 106 Results

107

### 108 **Single cell profiling of PDAC tumour immune cell infiltration across three datasets**

109 To elucidate the heterogeneity of tumour immune cell infiltration, we performed single cell RNAseq  
110 (GEX), ADT-seq (cell surface protein expression derived from Antibody-Derived Tags), and BCR/TCR-  
111 seq on CD45+ cells enriched from matched PBMCs and fresh tumour tissue following surgical resection  
112 of 12 treatment-naïve patients, herein referred to as PancriImmune. In addition to the PancriImmune  
113 dataset, we integrated and re-analysed the two largest existing PDAC scRNA-seq datasets from Peng<sup>10</sup>  
114 and Steele<sup>12</sup> (**Figure 1a**). Integrative multi-omics analysis of GEX, ADT-seq and BCR/TCR-seq allowed  
115 for high confidence and quality annotations of B cell, T cell and myeloid populations (**Figure 1b**,  
116 **Supplemental Table 1**), making this the largest single cell analysis of immune cells in PDAC with robust  
117 detection of immune cell diversity, whilst also being the first PDAC study to incorporate all four single  
118 cell modalities (GEX, ADT-seq, BCR-seq and TCR-seq). This high granularity analysis of immune cells in  
119 the blood and PDAC tumour infiltrate revealed high complexity of immune cell infiltration in the TME  
120 with a wide variety of activated and regulatory immune cells in all major immune subsets  
121 (**Supplemental Item 1**). The integrated Peng and Steele datasets only had GEX data and therefore we  
122 used a novel support vector machine (SVM) cell label transfer method, *SVMCellTransfer*, using the  
123 PancriImmune GEX data as a reference (**Supplemental Item 1, Supplemental Table 1**, see methods).  
124 The resulting gene expression patterns of each cell annotation type reflected well the patterns  
125 observed in the PancriImmune reference dataset (**Supplemental Item 1**).

126

### 127 **PDAC tumour myeloid infiltration positively associates with plasma cell abundance**

128 Patients' tumours span a spectrum of immune cell infiltration, and higher intra-tumoural T  
129 cell/lymphocyte frequencies are typically associated with improved patient survival (**Supplemental**  
130 **Table 2**). We therefore investigated next what might be mediating these differences. The proportion  
131 of immune cells consisting of tumour infiltrating myeloid cells inversely correlates with B and T cells  
132 consistently across datasets (p-values<1e-7, **Figure 1c**, p-values per dataset <0.018, **Table S3**). To  
133 better understand the mechanisms underlying this, we compared patients with high B and T cell  
134 tumour infiltrate proportions (as a percentage of CD45+ cells), termed adaptive-enriched (AE) versus  
135 high myeloid, low B and T cell proportions, termed myeloid-enriched (ME) (**Figure 1d-e**). This mirrors  
136 the prognostic signatures previously identified<sup>8</sup> and summarised in **Supplemental Table 2**. Indeed, the  
137 top 10 differentially expressed genes (DEGs) between groups (pseudobulk analysis) have  
138 predominantly B cell and T cell specificities for AE patients, or myeloid cell specificities for ME patients  
139 (**Supplemental Table 4**). The cellular subset proportions within B cells, T cells, NK cells and ILCs  
140 significantly differed between AE and ME groups across all three datasets, and were clearly separable  
141 by PCA analysis (**Figure 1e, Supplemental Figure 1a-c**). Across all three datasets, we observe  
142 significantly reduced plasma cell abundance with increased overall B and T cell infiltration, along with  
143 consistent trends in proportions of other immune cell populations demonstrated across datasets  
144 (**Figure 1f, Supplemental Figure 1d-e**), suggesting that different mechanisms of differentiation,  
145 proliferation and recruitment may be acting in the different patient groups. Indeed, this is in  
146 agreement with previous studies showing an association between plasma cells and myeloid cells in  
147 lymphoid tissues<sup>20-22</sup>.

148

149 We also confirmed that there are consistent significant differences in myeloid versus adaptive immune  
150 cell infiltration into the tumour when considering the total cell population (rather than just the  
151 proportion of CD45+ cells) in both the Peng and Steele datasets (**Supplemental Figure 1f**). There were  
152 no significant differences in the proportions of non-immune cell types between the ME and AE  
153 patients, suggesting that tumour load (found in the epithelial cell compartment) and non-immune cell  
154 composition is not driving these differences. No correlations were observed with other patient factors  
155 including age, gender, prior disease history.

156

157 ***Inverse correlation between ductal and immune cell subset proportions***

158 Using the Peng and Steele datasets where all pancreatic cells were present, we were able to dissect  
159 the correlations between the immune and non-immune cell compartments. Although there was no  
160 correlation between the epithelial cells and any other non-immune cell type, we saw the strongest  
161 significant inverse correlations between epithelial (containing the tumour cells) with the myeloid, T  
162 cells and NK cell proportions (**Supplemental Figure 1f**), suggesting direct immunosuppressive activity  
163 by the tumour cells. Moreover, there was no significant inverse correlation between the fibroblast  
164 compartment and the immune cell infiltration, which supports recent evidence disputing the  
165 previously held idea that the desmoplastic core limits immune infiltration<sup>23</sup>.

166

167 ***B cell selection is distinct between patient groups***

168 Next, we examined the intra-tumoural B cells in greater detail given their divergent proportions  
169 between patient groups. The proportions of both plasma cells (PCs) and plasmablasts (PBs) of total B  
170 cells were significantly higher in ME tumours than AE tumours (**Figure 2a**). IGHV gene usages and  
171 isotype features were distinct and clearly separable by PCA between AE and ME patients (**Figure 2b**,  
172 **Supplemental Figure 2a**, p-values<0.0125) suggesting different B cell repertoire selection processes  
173 between patient groups<sup>24</sup>.

174

175 ***Reduced B cell class-switching in AE patients***

176 Elevated IgA1 and IgA2 were observed in the intra-tumoural activated, memory, and antibody  
177 secreting PB cells in the ME patient group, whereas elevated IgG1 and IgM levels were observed in  
178 the AE group (**Figure 2c**). These differential phenotypes are suggestive of differences in B cell signalling  
179 and germinal centre (GC) or tertiary lymphoid structure (TLS) responses. Interestingly, the patients  
180 associated with better prognosis (AE) had reduced class switch recombination (increased proportion  
181 of IgM B cells) compared to ME. Indeed, this observation of elevated IgM in the better-prognostic  
182 patients is supported when examining the larger PDAC TCGA dataset (n=67 patients at stage II), in  
183 which we identified a weak but significant association between both high IGHM with improved  
184 survival (**Figure 2d**). In addition, IgM+ BCRs had lower levels of somatic hypermutation (SHM)  
185 (**Supplemental Figure 2b**). Taken together the AE patients may have distinctive GC reaction outcomes.  
186 We note that the dominant IGHA1, IGHA2 and IGHM isotype usages observed here also reflect what  
187 is seen in healthy pancreatic tissue (reanalysis of GTEx RNA-seq data, **Supplemental Figure 2c**). This  
188 could be suggestive that the pancreatic environment and supporting draining lymph nodes  
189 preferentially support class-switching to IGHA1/2 as observed in other GI tract locations, rather than  
190 a predominance of IGHG1/2 observed in non-GI tract tissues<sup>25</sup>. These differences in isotype usages  
191 were not observed in blood (**Supplemental Figure 2d**), in keeping with tissue-specific differences  
192 rather than differences in systemic B cell responses between patients. Fc receptors for IGHA  
193 (FCAR/CD89), which are known to have dual effect, either to inhibit or activate macrophage responses  
194 depending on either monovalent or multimeric IgA ligation<sup>26</sup>, are predominantly expressed in  
195 pancreatic myeloid cells, and Fc receptors for IGHM (FCMR) are predominantly expressed in B, T and  
196 NK cells (**Supplemental Figure 2e**). Together, this further strengthens the relationship between IGHM  
197 and improved survival (potentially as antigen presenting cells) as seen in lung cancer<sup>27</sup>, despite the  
198 signs of reduced GC efficiency, as seen in the AE group, and potentially the relationship between IGHA  
199 secretion and myeloid cell phenotypes driving one of the pathways of immune suppression in the ME  
200 patients.

201

202 ***Increased GC B cell clonality in AE patients***

203 We next assessed the clonality of the B cell subpopulations via two measures: intra-subset clonality  
204 which reflects specific cell populations which are actively expanding, and inter-subset clonality to  
205 reflect the expansion and differentiation between subpopulations (**Figure 2e**). Intra-subset clonality  
206 quantifies the percentage of cells in clones of 2 or more cells per subset, measuring the clonality within  
207 the subset. Inter-subset clonality quantifies the percentage of cells of each cell type as members of

208 clones of 3 or more cells across all populations, this indicates cells within each B cell subset that may  
209 be members of larger clones that span multiple phenotypes, reflecting B cell plasticity driven by the  
210 specific TME signals they encounter. The elevated clonality observed in ME of antibody secreting cells  
211 (PCs and PBs) suggests that these are arising from recent or ongoing immune reactions in ME patients.  
212 The relatively higher levels of inter-subset clonality in the naïve B cells in ME patients, despite the  
213 expectedly low intra-subset clonality, is likely driven by the activation and clonal expansion of some  
214 naïve B cells and transition to other B cell phenotypes. The highest intra-subset clonality was observed  
215 in the GC B cells in keeping with these cells partaking in clonal B cell response, potentially in TLSs.  
216 Indeed, these comprised the largest proportion of B cells from expanded clones (inter-subset clonality)  
217 along with memory B cells in the AE group only, with significantly lower inter-subset clonality in these  
218 cells in the ME patients. There were no significant differences in the proportions of GC B cells, which  
219 may be due to the small numbers of patients and GC cells. Together, this is suggestive of GC formation  
220 in AE patients with greater clonal expansion in GC B cells, however, resulting in unswitched memory  
221 B cells rather than intra-tumoural plasma cells. Conversely, GC B cells in ME patients are not as clonal,  
222 however, the responses are predominantly IGHA1 and IGHA2, and are more likely to differentiate into  
223 plasma cells.

224

### 225 ***B cells comprise a major pool of antigen presenting cells in AE patients***

226 B cells are considered as one of the major professional antigen-presenting cells (pAPCs) via the MHC  
227 II pathway<sup>28</sup>, however their role in the activation of T cells in PDAC has not been fully explored. Here,  
228 we derived a pAPC score for each cell by quantifying the feature expression programme for MHC II  
229 and accessory pathway molecules (see **Methods**). We defined pAPCs as those above a threshold  
230 derived from the optimal separation between scores from DCs (known pAPCs) and CD8 T cells (known  
231 non-pAPCs) (**Figure 2f**). Together with DCs, >65% of naïve and antigen-experienced (activated and  
232 memory) B cells and monocyte-derived macrophages (MoMacs) are pAPCs (**Figure 2g**). Whilst a mean  
233 of 57.6% of pAPC are MoMacs, and 21.1% of pAPC are DCs in the ME patients, only 16.0% of pAPCs  
234 are B cells (**Figure 2g**). Interestingly B cells comprise a major source of antigen presenting cells in the  
235 AE patient group, 80.4% of pAPCs are B cells (p-values<0.05), mainly antigen-experienced (activated  
236 and memory) B cells. This trend is validated in the Peng et al dataset (**Supplemental Figure 2f-i**, p-  
237 values<0.05). Given the elevated T cell infiltration in the AE patients (**Figure 1f**) and the significant  
238 contribution of B cells to the pAPC pool, this highlights a potential role for B cells in PDAC TME in  
239 shaping T cell activation.

240

### 241 ***Increased CD8 T cell clonality in AE patients***

242 To understand the drivers behind the increased T cell prevalence in the AE patients, we performed  
243 clonality analysis of the T cell populations using the TCR sequencing data. We observe an increased  
244 CD8 T cell clonality in the AE group (**Figure 3a**, p-values<0.05) which suggests that the increased PDAC  
245 lymphocyte infiltration is partly driven by clonal activation and expansion. This is observed in both  
246 tumour-infiltrating and peripheral blood T cells, implying that some of the tumour expanded clones  
247 could potentially be also present in blood. We further analysed the different sub-populations for any  
248 differential presence of T cell subsets between the two groups of patients. In addition to the elevated  
249 CD4:CD8 T cell ratio in ME patients (**Supplemental Figure 1a**, p-value<0.05), ME tumours showed  
250 higher proportions of Treg, activated Treg, and gamma-delta (gd) T cells, while AE tumours had higher  
251 proportions of T follicular helper (fh), naïve CD4 cells and CD8 effector memory (EM) cells (**Figure 3b**).  
252 The increased proportion of CD8 EM cells in the AE group further reinforces the role of clonal  
253 activation in driving T cell infiltration, and the elevated proportions of Tfh cells in the AE patients  
254 further supports the inter-relationship between B and T cells in PDAC. By contrast, the elevated  
255 proportions of Tregs and activated Tregs in the ME group could reflect the increased  
256 immunosuppressive TME of these tumours. A validation was performed via cellular deconvolution of  
257 the PAAD TCGA dataset (n=156 patients) showing that indeed Treg proportions (as a proportion of  
258 total T cells) correlated with myeloid cell proportions (as a proportion of total immune cells)

259 (Supplemental Figure 3a), whereas the T cell proportion of total immune cells inversely correlated  
260 with the proportion of myeloid cells (Supplemental Figure 3a). Furthermore, TCR clonality and TRVB  
261 features are distinct between AE and ME patients (Supplemental Figure 3b: PCA plot of T cell  
262 repertoire features, Supplemental Figure 3c: V gene usages). Together, this is suggestive of different  
263 T cell selection processes between ME and AE patients.

264

### 265 ***Activated Tregs are enriched in expanded T cell clones and are the most proliferative T cell*** 266 ***population***

267 We next assessed the clonality of the T cell subpopulations via intra-subset clonality and inter-subset  
268 clonality (Figure 3c). Intra-subset clonality measures the clonality within the subset, and inter-subset  
269 clonality quantifies the cells within each T cell subset that may be members of larger clones that span  
270 multiple phenotypes, reflecting T cell plasticity driven by the specific TME signals they encounter. The  
271 highest intra-subset clonality was observed in the CD8 EM, activated EM, effector memory cells re-  
272 expressing CD45RA (EMRA), exhausted and senescent T cells. There was preferential intra-subset  
273 expansion in the AE group of the CD8 EM and CD8 activated EM T cells. Taken with the increased  
274 percentages we observed earlier (Figure 3b), this provides additional support that the increased CD8  
275 EM presence in AE patients is driven by local expansion within the tumour. Notably, although activated  
276 Tregs, which are marked by the highest expression of immunomodulatory molecules TIGIT, ICOS, and  
277 CTLA4, as well as the transcription factors FOXP3 and IKZF2, were not the most clonal CD4 T cell  
278 population (intra-subset clonality), which is to be expected from a polyclonal regulatory T cell  
279 population, they were members of the most expanded clones (inter-subset clonality, Figure 3c), which  
280 was significantly more expanded in the ME patient group, suggesting some of the observed Tregs  
281 could be differentiating from other CD4 T cells within the TME.

282

283 The factors driving CD4 T cell differentiation toward CD4 Treg phenotype in PDAC are not yet  
284 understood, and whether increased proliferation or reduced apoptosis in the Treg populations were  
285 causing this association with clonal expansion. Indeed, activated Tregs represent the most  
286 proliferative lymphocyte population within the tumour (as measured by percentage cells in S phase  
287 and mean per cell GO\_T\_CELL\_PROLIFERATION score across all patients, Figure 3d). Conversely, there  
288 was no notable difference in apoptosis, as measured by mean per cell REACTOME\_APOPTOSIS  
289 pathway score. There were no widespread significant differences between patient groups. This is  
290 suggestive that activated Tregs are associated with clonal expansions and are the most proliferative T  
291 cell population within the tumour.

292

### 293 ***Distinct T cell clonal fate between AE and ME patient groups***

294 Through quantifying the relative overlap of clones between different phenotypes within the CD4 and  
295 CD8 T cell populations, lineage patterns can be discerned (Figure 3e). Indeed, highest clonal overlap  
296 in the CD8 T cell populations was observed between CD8 EM, activated EM and CD8 senescent T cell  
297 subsets, suggesting that common antigens are driving the expansions across these populations.  
298 Elevated intra-subset clonality was observed in the ME patients between CD8 EM and CD8 senescent  
299 T cell populations in the tumour, suggesting that activated T cells are pushed to dysfunctional  
300 phenotypes. The development of senescence in both patient groups suggest that the TME is conducive  
301 to the generation of these populations through potentially shared pathways. In the CD4 T cells,  
302 activated Tregs have the highest degree of clonal overlap with activated Tfh and activated Treg  
303 populations, which was significantly higher in the ME patients. In AE tumours there was higher clonal  
304 overlap between CD4 naïve and Tfh T cells. Taken together, these results point to differential CD4  
305 polarisation of intra-tumoural CD4 T cells between the ME and AE groups.

306

### 307 ***T cell clonality between tumour and blood are distinct***

308 Using the matched blood and tumour samples, we observed that the clonality of T cells between blood  
309 and tumour is highly divergent (Supplemental Figure 3d). Within the blood CD4 T cell compartment,



310 only CD4 senescent and Th1 T cells had high levels of intra-subset clonality. We noted that Tregs were  
311 not clonal in blood, with <5% of these cells comprising expanded clones, a possible indication that  
312 Tregs from TME expanded clones are tissue resident. In the CD8 T cell compartment, the CD8 EMRA  
313 and senescent populations were the most clonal populations and are significantly more clonal than  
314 their corresponding tumour T cell counterparts (**Supplemental Figure 3e**); which is to be expected for  
315 these populations as they are driven through chronic antigen exposure (in many cases viral)<sup>29</sup>. There  
316 was no difference in CD8 T cell clonality observed in the blood between ME and AE patients  
317 (**Supplemental Figure 3d**). Finally, to determine if the T cell responses within the tumour were  
318 enriched for systemic anti-viral responses rather than potential tumour-specific responses, we  
319 screened the tumour and blood-derived TCRs against a library of known anti-viral TCRs (see **Methods**).  
320 Indeed, we found that anti-viral T cell clones are not enriched in the tumour compared to the blood  
321 and there were no widespread consistent differences between ME and AE patients (**Supplemental**  
322 **Figure 3f**). This supports that tumour clones are not enriched for systemic non-tumour-reactive  
323 clones.

### 324 325 ***Immunosurveillance and resident tumour-infiltrating B and T cell clones are phenotypically distinct***

326 Our dataset benefits from having matched blood and tumour samples taken at the same timepoints  
327 allowing us to perform analysis to identify circulating tumour infiltrating lymphocytes (TILs). These can  
328 be identified from clones shared between blood and tumour and represent clonally expanded  
329 lymphocytes recirculating between tumour and blood and will therefore be critical for  
330 immunosurveillance. We identified B and T cell clones that were (a) shared between blood and  
331 tumour (recirculating clones), (b) tumour-only (non-circulating TIL clones) and (c) blood-only clones.  
332 These states, by definition, exhibit different cellular tendencies for tumour ingress and/or adhesion  
333 (**Figure 4a**). Circulating TIL B cells were enriched for naïve B cells in both AE and ME groups, suggesting  
334 that naïve B cells may be major components of immunosurveillance and selected B cells become  
335 activated in response to the TME (**Figure 4b**). This is supported by the elevated IGHM usage in  
336 circulating TIL B cell clones (**Supplemental Figure 4a**). Non-circulating TIL B cells were enriched for  
337 antibody secreting B cells and activated memory, suggesting that these are much less mobile upon  
338 tumour entry or differentiation. The dynamics of immune cell infiltration is explored in the next  
339 section.

340  
341 Next, we explored the dynamics of immune cell infiltration. Whilst there was no significant difference  
342 of specific CD4 T cell subsets between circulating and non-circulating TILs, circulating CD4 TILs are  
343 dominated by Tregs, Tfh, and Th2 (**Figure 4b**). Circulating CD8 TILs are dominated by CD8 EM T cells,  
344 which is consistent with the arrival of activated CD8 T cells from the tumour-draining lymph nodes.  
345 However, these were not statistically enriched compared to non-circulating CD8 T cell clones only  
346 found in the tumour. As expected, exhausted clones were enriched in the TME where they are most  
347 likely to encounter their antigen.

348  
349 We did not observe differences in the proportions of total recirculating B and T cell TIL clones between  
350 ME and AE patients (**Supplemental Figure 4b**). However, recirculating B and T cell TIL clones were  
351 significantly more expanded than clones private to the tumour or blood clones (**Supplemental Figure**  
352 **4c**). Finally, through screening the TCRs with a library of known anti-viral TCRs, we find that anti-viral  
353 T cell clones are not enriched in the circulating TILs compared to the non-circulating and blood-only T  
354 cell clones (**Supplemental Figure 4d**). This supports the conclusion that recirculating TIL clones are not  
355 enriched for systemic non-tumour-reactive clones.

### 356 357 ***Dynamics of recirculating tumour-infiltrated B and T cells***

358 Next, we considered how the phenotype of clonally-related B and T cells differ between the blood and  
359 the tumour. This can be measured through determining the phenotypes of B and T cells within the  
360 same clone shared between the blood and tumour (**Figure 4c, Supplemental Figure 4e-g**). Many of

361 the recirculating B and T cells have different phenotypes between blood and tumour, suggesting  
362 extensive intra-tumoural B and T cell differentiation within the tumour site and/or distal from the  
363 tumour. For B cells, the majority of recirculating B cells are derived from tumour-infiltrated naive,  
364 memory and activated pre-memory B cells. This suggests that selected naive B cells from the blood  
365 infiltrate the tumour, and these differentiate to express memory B cell markers before recirculating.  
366 This also provides evidence that the tumour may be a major site of B cell activation.

367  
368 For CD4 T cells, the largest overlap occurs between CD4 naïve and T helper phenotypes (Tfh, Th17,  
369 Th2, and Tregs) (**Supplemental Figure 4f**), suggesting naïve CD4 cells are being polarised based on  
370 intra-tumoural factors. The ME patient group has significantly higher overlap between naïve CD4s and  
371 activated Tregs, supporting that the myeloid-enriched TME in these patients is driving the  
372 differentiation and proliferation of activated Tregs from naïve cells. Blood CD8 senescent are  
373 predominantly related to CD8 EM, activated EM, EMRA and senescent, suggesting that these cells are  
374 derived from highly activated effector T cell clones, as expected<sup>30</sup>. Indeed, the clonal relatedness of  
375 blood CD8 EMRA and tumour CD8 EM T cells is supported by the observation that these subsets are  
376 the most clonal populations in the blood and tumour CD8 populations, respectively (**Supplemental**  
377 **Figure 2h**). Overall, these results demonstrate that the TME can differentially shape the B and T  
378 differentiation in the two patient groups.

### 379 380 ***B and T cell infiltration is dependent on chemokine receptor upregulation***

381 Previous reports have shown that chemokines are critical for the infiltration and egress of immune  
382 cells from tumours, including the CXCR4-CXCL12 axis shown in mouse models of melanoma<sup>31</sup>, as well  
383 as a pre-requisite for the formation of TLSs, including the CXCR5-CXCL13 axis<sup>32</sup>. Therefore, we  
384 considered the expression of key lymphocyte chemokine receptors upon infiltrating into the tumour  
385 which is possible to assess between matched tumour and blood samples in the PanImmune dataset  
386 where this is possible. The chemokine receptors CCR6, CCR7, CXCR3, CXCR4, CXCR5, and CXCR6 have  
387 the highest expression across lymphocytes (**Supplemental Figure 5a**), and CCR8, a known hallmark of  
388 tumour infiltrating Tregs, is exclusively expressed on Tregs<sup>33</sup>. We observe significant correlations  
389 between some chemokine receptors and lymphocyte infiltration, including CCR8 expression  
390 correlating with activated Treg levels (**Supplemental Figure 5b**). Differential gene expression (DGE)  
391 between blood and tumour infiltrating B and T cell subsets (see **Methods**) revealed that multiple  
392 chemokines and their receptors are upregulated upon entry to the tumour (**Figure 4d, Supplemental**  
393 **Figure 5c**). Upregulation of chemokine receptors in TILs implies that they are central to recruitment  
394 and maintenance of these immune cell types within the tumour. Of note, CXCR4 was significantly  
395 upregulated across 24 out of 28 lymphocyte populations in the AE patient group, but in the ME group,  
396 CXCR4 was not upregulated in B cells, MAIT, gamma/delta or CD8/CD4 senescent T cells, in accordance  
397 with their lower prevalence in this patient group. Similarly, CXCR5 was only observed to be  
398 upregulated in tumour non-naïve B cells and Tfh T cells only in the AE but not in ME patients. Lower  
399 CXCR5 in tumour B cells and Tfh T cells in ME patients will likely impact the effectiveness of B cell  
400 migration, retention and responses within the tumour site. CCR8 expression is significantly increased  
401 in intra-tumoural Tregs compared to blood, predominantly in ME patients, with the highest CCR8  
402 expression observed in activated Tregs. Indeed, the same trends were observed when considering  
403 only immunosurveillance clones (clones shared between blood and tumour) (**Supplemental Figure 5d-**  
404 **e**). Overall, we observed reduced chemokine receptor expression in intra-tumoural ME patient  
405 lymphocytes.

406  
407 Finally, we show that only TIL T cell clones tend to be acutely activated with elevated CD69 and  
408 PD1) whereas the blood counterparts of same clones are not acutely activated (**Figure 4d**). However,  
409 the significant upregulation of CD69 was observed in only AE patients for B cells and multiple CD4 T  
410 cell populations, suggesting reduced activation in specific lymphocyte subsets in ME patients.

411

### 412 **Myeloid cells in ME patients dominate cell-cell communication**

413 We have thus far shown that differential immune cell subtype frequencies distinguish ME and AE  
414 patients and lymphocyte-associated differences. We next examined the cell-intrinsic differences in  
415 cell-cell communication between immune cells between ME and AE patients. Here we considered cell-  
416 cell interaction strengths between known cytokine- and inflammation-associated ligands and their  
417 receptors (see **Methods**). The signalling strengths between each pair of cell subtypes for each  
418 receptor-ligand pair was calculated by multiplying the percentage of cells per cell subtype expressing  
419 each respective gene for each patient. Thus, the strengths are independent of the total proportions  
420 of each cell type within the tumour (**Figure 5a**). The cell-cell communication network depicted an  
421 expected high level of complexity within the tumour microenvironment with each cell subtype  
422 providing and receiving signals from many other cells. However, within this complexity, several  
423 features were clearly observed. Firstly, ME patients had significantly higher levels of signalling  
424 between myeloid and T cell populations, and AE patients had higher levels of signalling between B cell  
425 and T cell populations. Indeed, enumerating the number of incoming and outgoing interactions  
426 (corresponding to or from cell-surface receptors, respectively, **Figure 5b**) clearly demonstrated that  
427 immune signalling within the tumour was dominated by myeloid cells in ME patients and B and T cells  
428 in AE patients. The highest levels of incoming and outgoing interactions within ME patients were from  
429 MoMac, moDC and granulocyte populations, whereas the highest levels within AE patients were from  
430 CD8 EM T cells and memory B cells. Although the proportions of GC and MZ B cells were very low (<5%  
431 of total B cells, **Figure 2a**), we observed that these cells have considerable contributions to cell-cell  
432 signalling, and indeed significantly higher interactions were seen in the AE patients.

433  
434 The top significantly enriched immune modulator in the ME patients was SPP1 (**Figure 5c**) which  
435 encodes for osteopontin, and is overexpressed in PDAC and known to potentiate tumour cell  
436 stemness, M2 macrophage polarisation<sup>34</sup>, checkpoint expression<sup>35</sup> and is associated with poorer  
437 survival across multiple cancers including PDAC<sup>36</sup>. AXL was the third most ME-enriched cytokine that  
438 induces mregDC formation and upregulation of PD-L1 expression<sup>37</sup>. Indeed, the top 30 significantly  
439 enriched immune modulators in ME patients included CCL8, a ligand for the tumour infiltrating Tregs  
440 chemokine receptor CCR8, PVR, a ligand for the T cell checkpoint protein TIGIT and ITGA8, which is  
441 known to activate TGF $\beta$  (**Figure 5c**).

442  
443 We next considered the signalling interactions to Tregs which are known for being associated with  
444 immunosuppression within the tumour microenvironment. The ranked interaction strengths between  
445 the key Treg chemokine receptors (CCR4, CCR8, CXCR4 and CXCR6) and their ligands per cell type  
446 (**Figure 5d, Supplemental Figure 6a-b**) showed that the incoming interactions with Tregs were  
447 dominated by myeloid cells, notably mregDCs (driven by their expression of CCL17 which interacts  
448 with CCR4 from Tregs) as well as the regulatory axis CCL22-CCR4 which promotes Treg function<sup>38</sup>, and  
449 DC2B CCL17+ and multiple MoMac populations (driven by their expression of CXCL16 which interacts  
450 with CXCR6 from Tregs). Finally, interactions with the Treg-exclusive receptor CCR8 were dominated  
451 by MoMac expression of CCL8. Indeed, MoMacs were more numerous in ME patients (**Supplemental**  
452 **Figure 1a**), and thus would support the infiltration of Tregs into the tumour region. Whilst the  
453 expression of the Treg-associated chemokines, CCL17 and CXCL16, was observed in non-immune cells,  
454 including epithelial cells (which includes the tumour cells) (**Supplemental Figure 6c**), the highest  
455 expression of these chemokines was within the myeloid MoMac and DC populations. Together, these  
456 findings demonstrate a key role of myeloid cells in promoting the immune-regulatory nature of the  
457 PDAC TME.

### 458 459 **Checkpoint genes are upregulated across both immune and non-immune cell subsets in PDAC**

460 Finally, we examined the immunosuppressive nature of the whole TME including non-immune cells.  
461 Differential gene expression (DGE) analysis between PDAC and normal adjacent tissue from the Peng  
462 *et al.* dataset showed significantly elevated checkpoint gene expression in both immune and non-

463 immune cell compartments (**Figure 5ei, Supplemental Figure 6d**). While T cells are the primary source  
464 of TIGIT expression, stellate, epithelial and endothelial cells also have increased expression in the  
465 tumour compared to pancreatic adjacent normal tissue. Likewise, ICOS and CTLA4 are primarily  
466 expressed by T cells, but are significantly higher in expression in tumour compared to pancreatic  
467 adjacent normal tissue in epithelial and endothelial cells. Differential expression of TIGIT, ICOS and  
468 CTLA4 ligands were observed in both immune and non-immune cell types. Treg-associated chemokine  
469 receptor CCR8 ligands, CCL8, CCL16 and CCL18, were also elevated in tumour tissue stellate, epithelial  
470 and endothelial cells. Although the highest levels of CCL18 was expressed by MoMacs, stellate cells  
471 also contributed significant levels of Treg-specific chemokines suggesting a key role for both immune  
472 and non-immune components in shaping the TME into an immunosuppressive environment during  
473 tumourigenesis (**Figure 5eii**)<sup>39</sup>.

## 474 475 **Discussion**

476 Our work sheds new light on the potential mechanisms that might underlie the observed differences  
477 between myeloid-enriched and adaptive-enriched PDAC tumours. Combining scRNA-seq, CITE-seq  
478 and TCR and BCR repertoire analysis of matched blood and tumour samples allowed, for the first time,  
479 the identification of different patient groups with distinct immune cell infiltration, selection,  
480 differentiation and response mechanisms within the TME, providing a rational way for the selection  
481 and design of novel immunotherapeutic interventions for PDAC patients. To this end, we developed  
482 several new bioinformatics tools, including (a) *SVMCellTransfer* which allows for efficient and effective  
483 annotation of published scRNA-seq datasets based on a reference high-confidence dataset, (b)  
484 *scClonetoire* which quantifies the intra- and inter-subset clonality and other repertoire metrics run on  
485 single cell multi-omics repertoire data, (c) *scRepTransition* which quantifies the clonal overlap  
486 between B or T cell subsets within a sample or between samples. Importantly, *scClonetoire* and  
487 *scRepTransition* account for sampling depth differences between samples thus ensuring the ability for  
488 statistical comparisons between samples. This comprehensive analysis of the immune landscape  
489 within treatment-naive PDAC patients provides a valuable scMulti-omics dataset with high-confidence  
490 annotations and important insights into the TME.

491  
492 Through our multi-omics analyses, we show that dominant immune mechanisms within AE patients,  
493 characterised by a low infiltration of myeloid cells and increased proportion of lymphocytes, include  
494 dysfunctional GC (or TLS) responses, lower isotype switching, and higher occurrence of IgM+ B cells,  
495 and lower generation of plasma cells. The predominance of intra-tumoural memory B cells and the  
496 elevated cell-cell interaction signals between B and T cells suggests an antibody-independent role of  
497 B cells, such as antigen presentation. Indeed, the predominant contributors of professional APCs in AE  
498 patients were B cells, highlighting a potential role for B cells in PDAC TME in shaping T cell  
499 activation<sup>40,41</sup>. However, the poor class switching and SHM in AE patients is indicative that some  
500 factors that are needed for TLS formation and cell recruitment could be defective, hampering the full  
501 development of a GC-like response. T cells, on the other hand, showed clearly increased clonality and  
502 higher levels of cytotoxic T cells, yet their ability to control tumour was limited, possibly due to poor  
503 infiltration or retention outside the tumour core due to high stromal expression of the CXCR4 ligand,  
504 CXCL12 or/and the development of senescence.

505  
506 ME patients have exhibited a poorer survival signature across multiple studies, and are characterised  
507 by the higher infiltration of myeloid cells. Here we showed that ME tumours have a higher presence  
508 of immuno-regulatory moMacs and mregDCs. Indeed, we show in our clinical cohort that myeloid cells  
509 can act as coordinators of further immuno-suppressive mechanisms through extensive cell-cell  
510 signalling mechanisms that are distinct from AE patients, including the attraction of regulatory T cells  
511 into the TME<sup>42</sup>. Tregs in ME patients are highly expanded from naive T cells, likely driven by the high  
512 levels of TGFb in the pancreatic TME<sup>43,44</sup>. Their association with Tfh T cells could be a driver of  
513 differentiation of Tfr (T follicular regulatory cells) which further limit the GC B cell responses in those

514 patients<sup>45,46</sup>. Reduced GC B cell clonal expansion but increased plasma cell fate in ME patients points  
515 to direct macrophage-plasma cell cross-talk inducing plasma cell differentiation<sup>22</sup>. GC B cells in ME  
516 patients were not as clonal as in AE patients, however, the plasma cell responses are predominantly  
517 via IGHA1 and IGHA2. Indeed the IgA isotype can engage with the inhibitory Fc receptor FCAR on  
518 myeloid cells, and can mediate inhibitory effects on many immune cell subsets via activation of Fc $\alpha$ RI  
519 receptors and induction of IL10 production<sup>47</sup>. Indeed, previous studies have shown that tumour-  
520 associated antibodies may also exert a pro-tumoural effects through inflammation initiation and  
521 maintenance, tissue remodelling, and angiogenesis<sup>48,49</sup>.

522  
523 We further reveal differential B and T cell selection within the tumour between ME and AE patients.  
524 Their infiltration into the tumour may also be limited in ME patients due to the lack of upregulation of  
525 key chemokine receptors upon entry into the tissue, including CXCR4 and CXCR5, which have been  
526 shown to be important for control of B and T cell trafficking into tissues and play central roles in  
527 orchestrating the adaptive cell functions<sup>50</sup>. Indeed, CXCR4 upregulation is known to be driven by  
528 factors including hypoxia (HIF1A and VEGF)<sup>51</sup>, where the pancreas is a significantly more hypoxic  
529 environment than the blood<sup>52</sup>. However, previous studies have shown that extent of hypoxic areas  
530 within the tumour correlates with worse survival of PDAC patients<sup>52</sup>. Alternatively, strong antigen  
531 signalling has been shown to downregulate CXCR4 in T cells in melanoma<sup>53</sup>. However, stronger antigen  
532 signalling in the ME patients is not well supported due to the higher Treg levels, lower T cell infiltration  
533 levels, and lower levels of B-T cell interaction signals. This lays the foundation for future studies  
534 determining the key molecular factors influencing lymphocyte infiltration and egress.

535  
536 Overall, we can identify numerous potential mechanisms that might underlie the observed differences  
537 between ME and AE patients and highlight two potential major themes for immune intervention  
538 within PDAC patients. In ME patients, targeting the inhibitory myeloid compartment alongside specific  
539 targeting of tumour infiltrating Tregs may have the ability to alleviate some of the suppressive  
540 mechanisms. For example, the CCR4 and CCR8 pathways are highly active in Tregs and appear to play  
541 a crucial role within the TME and their interactions with myeloid cells. It is important to note that the  
542 interplay within the TME between the different populations is complex and redundant effects could  
543 be at play, as previous reports have suggested that depleting Tregs or fibroblasts can both result in  
544 worsening of the disease through the conversion by TGF $\beta$  of a pathogenic myeloid population even as  
545 CD8 T cell responses can be improved<sup>42,54-56</sup>. It is therefore critical to start considering those  
546 interventions in combination. AE patient tumours contain diverse lymphocyte subsets, and their  
547 activation status suggests that sufficient neoantigens are presented to them. However, the immune-  
548 incompetent TME is potentially preventing proper anti-tumour immune responses as can be seen with  
549 high levels of CXCR4 on the B cell compartment, potentially restricting their access to the tumour core  
550 via retention outside. Indeed, higher number and a specific locations of B cells quality in TME, maturity  
551 of TLSs, and neoantigen have been shown in PDAC long-term survivors<sup>16</sup>. These data suggest that  
552 patients with higher adaptive cell infiltration may benefit most from boosting the immune response  
553 against abortive or dysfunctional TLSs, which may potentially be achieved by cancer vaccines<sup>57</sup>,  
554 targeting T cell senescence and/or targeting chemokines. Conversely, patients with higher myeloid  
555 cell infiltration may benefit most from selective targeting of Treg functions, such as with anti-  
556 CCR8<sup>33,58,59</sup> and plasma cells.

557  
558 This study lays the foundation for understanding why immunotherapy has so far not been successful  
559 in PDAC and provides an avenue for designing novel therapeutic targets based on a complete  
560 understanding of patient intra-tumoural immune heterogeneity. We demonstrate the need for trials  
561 to assess changes in immune infiltration over time and under different therapies to build a spatio-  
562 temporal understanding of the tumour-immune cross-talk dynamics. Overall, this framework, which  
563 combined multimodal data, integrated knowledge-based, unsupervised microstructural annotations,  
564 and novel computational tools, has the power to drive niche discovery and can be applied to other

565 tissues in health and disease, such as in cancers with similar AE and ME differential prognostic  
566 signatures including glioblastoma<sup>60</sup>, breast<sup>61</sup>, prostate<sup>62</sup>, non-small cell lung cancer, melanoma<sup>63</sup>,  
567 bladder cancer<sup>64,65</sup>.

## 568 **Materials and Methods**

569

### 570 **Sample access and preparation for scRNA-seq**

571 Patients who underwent a curative resection for pancreatic ductal adenocarcinoma were consented  
572 for this study. Eight patients were recruited from Oxford under the Oxford Radcliffe biobank  
573 (09/H0606/5+5, project: 19/A177). Four patients were recruited from Aachen medical centre under  
574 RWTH Aachen biobank project: EK360/19. Informed consent was obtained for all patients. The study  
575 was in strict compliance with all institutional ethical regulations. All tumour samples were surgically  
576 resected primary pancreatic ductal adenocarcinomas. All tumours were subjected to pathological re-  
577 view and histological confirmation by two expert PDAC pathologists before analysis. A supplement  
578 providing individual clinical information is provided as Table S1.

579

580 The methods for sample collection, PBMC isolation and tissue digestion were previously designed in  
581 our manuscript Sivakumar et al. in methods section 5.2-5.4<sup>7</sup>.

582

### 583 **scMulti-omics sequencing and pre-processing**

584 scRNAseq transcriptome processing was performed using the Chromium 10x system involving GEM  
585 generation, post GEM-generation clean-up, cDNA amplification and DNA quantification. The library  
586 was sequenced using the Illumina NovaSeq platform. Chromium Single Cell Immune Profiling Reagent  
587 Kits v1.1 solution was used to deliver a scalable microfluidic platform for digital CITEseq (Cell Surface  
588 Protein), GEX, VDJ TCR and VDJ BCR by profiling 500-10,000 individual cells per sample. Libraries were  
589 generated and sequenced from the cDNAs and 10x Barcodes were used to associate individual reads  
590 back to the individual partitions.

591

592 The analysis pipeline applied to process Chromium single-cell data to align reads and generate feature-  
593 barcode matrices was performed as previously described<sup>66</sup>. Briefly, gene expression FASTQ files were  
594 processed using Cellranger count (v3.1.0) to perform alignment, filtering, barcode counting, and UMI  
595 counting, using 10X Genomics' GRCh38 v3.0.0 reference for Gene Expression analysis and IMGT's  
596 reference for VDJ TCR and BCR analysis. It uses the Chromium cellular barcodes to generate feature-  
597 barcode matrices, determine clusters, and perform gene expression analysis.

598

### 599 **Filtering, doublet detection and batch correction of the PancrImmune dataset**

600 For each sample, cells with fewer than 500 transcripts or 500 genes were filtered out. Normalisation  
601 and scaling was done using the standard Seurat pipeline. Principal component analysis (PCA) was  
602 performed on 5,000 highly variable genes (HVGs) to compute 50 principal components, then *Harmony*  
603 was performed (reference) for batch correction, UMAP for dimensionality reduction, and the Louvain  
604 algorithm was used for clustering. These clusters were then annotated broadly into B cell, T cell or  
605 myeloid clusters based on mapping of >10% BCR+ droplets and elevated CD19 expression, >10% TCR+  
606 droplets and elevated CD3 expression, <10% BCR/TCR+ droplets, respectively.

607

608 Doublet identification and removal was performed using both DoubletFinder<sup>67</sup> and MLtiplet<sup>68</sup>. Each  
609 cell type was subsetted into individual objects, and re-clustering within these objects was performed  
610 excluding genes which were likely to be influenced by experimental rather than biological factors<sup>69</sup>.  
611 These include genes encoding for TCR variable chain, ribosomal proteins, heat shock proteins,  
612 mitochondrial proteins, cell cycle proteins, HLA, and noise-related genes (MALAT1, JCHAIN, XIST). For  
613 the B and T cell objects, immunoglobulin variable, TCR variable and isotype genes were also excluded.

614

### 615 **Cell type annotations**

#### 616 ***T/NK cell annotations of the PancrImmune data:***

617 The re-dimensionality reduced T cell object resulted in 100 clusters generated by k-means. Where  
618 ADT-seq data was available this was used in preference to RNA for annotation. T cell clusters were

619 defined by mean proportion TCR expression  $>0.3$ , with innate clusters being those with mean  
620 proportion TCR  $<0.3$ . Individual cells in innate clusters which expressed TRA or TRB sequences were  
621 labelled as NK-like T cells.

622  
623 The innate cells were re-clustered without the T cells to generate 10 clusters, and were labelled by  
624 gene expression, ILC1 (TBX21, IFNG, CCL3), ILC3 (RORC, AHR, IL23R, IL1R1), gdT (TRDC), NK (EOMES,  
625 GZMA, GNLY, KLRC1) based on *de Andrade, et al.*<sup>70</sup>. CD56 bright (immature) NK cells were labelled  
626 based on ADT-seq CD56 expression. The remaining NK clusters were labelled based on gene  
627 expression patterns to give phenotypic descriptions. NK transitional cells have greater expression of  
628 cytokines, chemokines and their receptors (XCL1, XCL2, CXCR4), NK mature cells have greater  
629 expression of cytotoxic genes (GZMA, GZMB, PRF1), NK terminal cells have greater expression of  
630 adaptive genes (*PRDM1*, *ZEB2*).

631  
632 CD4 and CD8 clusters were defined by ADT-seq expression. As has been well documented in T cell  
633 single cell papers, there were clusters with overlapping CD4 and CD8 expression. Cells in overlapping  
634 clusters were reassigned at the single cell level if either CD4 or CD8 expression was higher. Memory  
635 phenotypes were label based on CD45RA, CD45RO, and CD62L expression. Naïve (CD45RA, CD62L),  
636 EMRA (CD45RA), EM (CD45RO), CM (CD45RO, CD62L). Further phenotypic labels were based on RNA  
637 expression. Exhausted (4 or more of the following: HAVCR2, PDCD1, TOX, LAG3, CTLA4, TIGIT, CD38,  
638 ENTPD1). CD4 cells: Treg (FOXP3), senescent (B3GAT1, KLRG1, CD28<sup>-</sup>, CD27<sup>-</sup>), Tfh (BCL6, ICOS, CXCR5),  
639 Th17 (RORC), Th2 (GATA3), Th1 (TBX21). Finally, clusters were labelled as activated based on HLA-DR  
640 ADT-seq expression.

641

#### 642 ***B cell annotations of the PancrImmune data:***

643 The re-dimensionality reduced B cell object resulted in 34 clusters generated by Louvain clustering,  
644 and AddModuleScore was used to identify enriched phenotypes (Table S7). Plasma cells were defined  
645 as clusters with the percentage of droplets above the 95th percentile BCR nUMIs (percBCR\_high)  $>40\%$   
646 and PC score  $>0.04$ , plasmablasts as percBCR\_high  $>15\%$ , naive B cells with  $>80\%$  unmutated BCRs and  
647  $>98\%$  IGHD/M BCRs, and memory B cells with mean CD27 expression  $>0.1$ . The following cell types  
648 were based on AddModuleScores and mean gene expression: B cell memory activated ( $>0.3$  activated  
649 score and CD27 expression  $>0.1$ ), B cell activated pre-memory ( $>0.4$  activated score and CD27  
650 expression  $<0.1$ ), B cell MZ ( $>0.8$  FGR score and CD27 expression  $>0.1$ ), B cell GZMB+ memory (GZMB  
651 expression  $>0.3$  and CD27 expression  $>0.1$ ), B cell pre-GC ( $>0.2$  GCB\_FT or  $>0.02$  preGC score), B cell  
652 GC ( $>0.3$  GC score), of which B cell DZ GC ( $>0.9$  DZ GC), B cell LZ GC ( $>0.3$  LZ GC score). Finally, naive B  
653 cells were reassigned at the single cell level if there was  $>3$  SHM, if the isotype was not IGHD/M, or if  
654 there was detectable CD27 expression (activated memory) or without CD27 expression (activated pre-  
655 memory).

656

#### 657 ***Myeloid cell annotations of the PancrImmune data:***

658 The re-dimensionality reduced myeloid subsetted object was used to identify enriched phenotypes  
659 (Table S7). We downsampled the cells to 2000 UMIs/cells and selected variable genes similarly to the  
660 seeding step of the clustering. To focus on biologically relevant gene-to-gene correlation, we  
661 calculated a Pearson correlation matrix between genes for each sample. For that purpose expression  
662 values were log transformed  $\text{Log}(1+\text{UMI}(\text{gene}, \text{cell}))$  while genes with less than 5 UMIs were excluded.  
663 Correlation matrices were averaged following z-transformation. The averaged z matrix was then  
664 transformed back to correlation coefficients. We grouped the genes into gene “modules” by complete  
665 linkage hierarchical clustering. Specifically, semi-supervised module analysis by complete linkage  
666 hierarchical clustering was carried out on variable, biologically-meaningful, and abundantly expressed  
667 genes<sup>71</sup>. For example, curated cell-cycle genes and other lateral programs (such as HLA- and HIST-)  
668 were excluded from module analysis. Subsequently, myeloid cells were assigned annotations at two



669 levels of granularity based on prior knowledge of marker genes and modules, spanning PDAC and  
670 other cancer datasets.

671

### 672 **Annotation of published datasets using SVMCellTransfer**

673 The raw gene-count matrices from Steele et al. and Peng et al. were downloaded from <sup>10,12</sup> and filtered  
674 using the same parameters as above, and merged. The B, T and myeloid cells were identified and  
675 separated in individual objects, merged and batch corrected with the PancrImmune populations via  
676 Harmony, and annotated using the custom-written support vector machine (SVM) cell label transfer  
677 method, *SVMCellTransfer*. The non-immune cells from the Peng et al. and Steele et al. datasets were  
678 merged, batch-corrected and broad cellular annotations were performed using published cell-type  
679 markers (**Supplemental Item 1**).

680

### 681 **BCR-seq/TCR-seq analysis**

682 A pipeline, *sclsoTyper*, was written to assign most probable BCR IGH and IGK/L chains per droplet  
683 (based on nUMIs) and most probable TCR TRA and TRB chains per droplet (based on nUMIs).  
684 Annotations were performed using IMGT, and clonality was performed using a single-cell extension of  
685 established VDJ network construction software from Bashford-Rogers *et al.*<sup>24</sup> as part of *sclsoTyper*.

686

687 *scClonetoire* was written to quantify the intra- and inter-subset clonality and other repertoire metrics  
688 run on single cell multi-omics repertoire data. Intra-subset clonality measures the number of B, CD4  
689 or CD8 T cell clones with 2 or more cells within each cell subset. This accounts for sampling depth  
690 differences between samples through generating a mean across 1000 subsamples a set depth of each  
691 sample (n=5 cells). Inter-subset clonality measures the percentage of B, CD4 or CD8 T cells of each cell  
692 type as members of clones 3 or more cells across all populations. This accounts for sampling depth  
693 differences between samples through generating a mean across 1000 subsamples a set depth of each  
694 sample (n=50 cells). These sampling depths were chosen to ensure values were captured across as  
695 many immune cell subsets as possible, even when the cell type was rare, whilst still ensuring  
696 representation across the sample.

697

698 The quantification of clonal overlap between B, CD4 or CD8 T cell subsets within a sample or between  
699 samples was performed using a novel pipeline called *scRepTransition*. For the clonal overlap between  
700 B, CD4 or CD8 T cell subsets, the absolute number of B or T cells within the same with different cellular  
701 annotations was quantified. For all samples in which 1 or more clonal overlaps between cellular  
702 annotations was observed, these were normalised to sum to 1. The relative proportions were  
703 statistically compared between patient groups via MANOVA.

704

705 Viral TCR detection was performed using VDJdb<sup>72</sup>, McPAS<sup>73</sup> and TCRdb<sup>74</sup> as reference datasets.

706

### 707 **Cell-cell interaction analysis**

708 The human ligand-receptor database was accessed from Fantom (<https://fantom.gsc.riken.jp/>), and  
709 intercepted the genes that were captured in the PancrImmune scMulti-omics dataset (**Table S5**). The  
710 signalling strengths between each pair of cell subtypes for each receptor-ligand pair was calculated by  
711 multiplying the percentage of cells per cell subtype expressing each respective gene for each patient.  
712 This was calculated for each cell subtype with  $\geq 3$  cells. This was plotted using *igraph* in R, and  
713 MANOVA was used to determine statistical differences between patient groups. The number of  
714 inbound and outbound links between cell subtypes was the counts of all corresponding non-zero  
715 receptor-ligand signalling strengths (**Figure 5b**). This was computed using *igraph* in R. Ranked  
716 interaction strengths per cell type were extracted per receptor-ligand pair for the Treg-specific  
717 analysis (**Figure 5c**).

718

## 719 **APC analysis**

720 The pAPC score for each cell (which quantifies the feature expression programme for MHC II and  
721 accessory pathway molecules) was calculated using the AddModuleScore using the pAPC pathway  
722 genes (Table S7). The distributions of scores from DCs (known pAPCs) and CD8 T cells (known non-  
723 pAPCs) was used to define a threshold above which we defined cells as being pAPCs using a logistic  
724 regression classifier via fitting a *glm* in R. The statistics between the proportions of tumour pAPC cells  
725 between patient groups was performed using MANOVA.

## 727 **Differential gene expression analysis and pathway analysis**

728 Pseudobulk differential gene expression methods were employed using the edgeR<sup>75</sup> package for  
729 analysis of aggregated read counts per cell type per patient. This was chosen to reduce the false  
730 positive detection rates, reduce biases between patient samples, and address the problem of zero  
731 inflated scRNAseq expression data. Briefly, for cells of a given type, we first aggregated reads across  
732 cells within each patient. The likelihood ratio test as well as the quasi-likelihood F-test approach  
733 (edgeR-QLF). For limma, we compared two modes: limma-trend, which incorporates the mean-  
734 variance trend into the empirical Bayes procedure at the gene level, and voom (limma-voom), which  
735 incorporates the mean-variance trend by assigning a weight to each individual observation<sup>76</sup>. Log-  
736 transformed counts per million values computed by edgeR were provided as input to limma-trend.  
737 Differentially expressed genes were defined as adjusted p-values <0.05. Pathway scores per cell were  
738 calculated using the *AddModuleScores* function in Seurat in R using pathway gene sets  
739 (GO\_T\_cell\_proliferation and REACTOME\_apoptosis).

## 741 **Survival analysis**

742 Data from the PAAD TCGA (<https://portal.gdc.cancer.gov/>) was downloaded and normalised. Patients  
743 that were not pathologically PDAC including samples with <1% neoplastic cellularity, neuroendocrine,  
744 IPMN and acinar cell carcinoma were excluded based on sample annotations  
745 (<http://api.gdc.cancer.gov/data/1a7d7be8-675d-4e60-a105-19d4121bdebf>). R packages survival and  
746 survminer were employed. The Kaplan Meier (KM) curve was plotted using *survfit* in R to observe  
747 survival probabilities over time between patient groups (high versus low IGHM expression).  
748 *Surv\_cutpoint()* and *surv\_categorize()* was used to determine an optimal cutpoint using maximally  
749 selected rank statistics for IGHM expression. The cox regression model was used to estimate and  
750 compare hazard ratios between IGHM high and low groups.

## 752 **Cell composition deconvolution**

753 Deconvolution between the PancrImmune and TCGA datasets was carried out using BayesPrism<sup>77</sup>, a  
754 Bayesian method to infer cell type fraction. The intersection of genes present in both datasets was  
755 identified, and the raw untransformed count data was used. To assign cell type labels, cell types from  
756 annotated single-cell data was used. Substantial heterogeneity was accounted for by creating cell  
757 state labels through sub-clustering of cell types within each patient. A threshold of 50 cells per cell  
758 state was applied to ensure a sufficient number of cells for accurate sub-clustering. Genes related to  
759 ribosomes, mitochondria, chromosome X, and chromosome Y were filtered out from the analysis, as  
760 their presence could introduce bias. When running prism object, count matrix was used as input type  
761 and key was set to NULL since there were no malignant cells present in the PancrImmune dataset, as  
762 recommended by the authors. All other parameters were left at their default values. The mean cell  
763 expression was then obtained from *get.theta()* function. Subsequently, downstream analysis included  
764 PCA to divide TCGA cohort as myeloid high, adaptive enriched followed by plotting the proportions.

## 766 **Code and data availability**

767 All code is available via <https://github.com/rbr1/sclsoTyper/>,  
768 [https://github.com/rbr1/PancrImmune\\_PDAC\\_paper](https://github.com/rbr1/PancrImmune_PDAC_paper), and  
769 <https://github.com/sakinaamin/BayesPrism>. Data will be made available via XX (currently in progress).

770

## 771 **Acknowledgements**

772 Firstly, we would like to thank the patients and clinicians who contributed to this study. S.S. was  
773 funded on an Oxford-BMS Fellowship with additional funding for the single cells sequencing from BMS  
774 and the CRUK Oxford Centre. M.L.D. and J.W. were supported by the Kennedy Trust for Rheumatology  
775 Research Cell Dynamics Platform 20 21 17. R.J.M.B.-R. and F.A.T. were supported by the Wellcome  
776 Trust, University of Oxford and Oxford Cancer Centre. B.S was supported by the Association of British  
777 Neurologists via the Patrick Berthoud Charitable Trust. M.R.M and B.F are supported by the NIHR  
778 Biomedical Research Centre at Oxford. S.H. was supported by the NIH NCI transition fellowship K00  
779 CA223043. The views expressed in this article are those of the authors and not necessarily those of  
780 the National Health Service, the NIHR, or the Department of Health. A.J. was funded by a Clarendon  
781 scholarship and S.A. was funded by Clarendon in partnership with St John's College. We thank  
782 Theodosios Kyriakou and Angela Lee for overseeing the sample submission at the Wellcome Centre  
783 for Human Genetics in Oxford. This work was supported by BMS.

784

## 785 **Authors' contributions**

786 S.S. and E.A-S., M.L.D., R.J.M.B-R conceived and designed the analysis. S.S., L.H., F.T., H.S., S.R., I.N.,  
787 J.W., A.E.F., G.W., U.P.N., P.C., L.S., R.J.M.B-R collected the data. S.S., A.J., E.A-B, M.N.L., P.K.S., S.A.,  
788 S.H., A.M., B.S., S.R., I.N., B.F., R.J.M.B-R contributed data or analysis tools. A.J., E.A-B, M.N.L., P.K.S.,  
789 S.A., S.H., A.M., S.R., I.N., D.P., M.Merad, M.L.D., R.J.M.B-R performed the analyses. All authors  
790 contributed intellectual input/interpretation. S.S., A.J., E.A-B, M.L.D., E.A-S., R.J.M.B-R wrote the paper  
791 with input from all other authors.

792

## 793 **Declaration of interests**

794 R.J.M.B.-R. is a co-founder of Alchemab Therapeutics Ltd and consultant for Alchemab Therapeutics  
795 Ltd, Roche, Enara Bio, UCB and GSK. S.S. held a personal fellowship from BMS during this study with a  
796 grant provided to conduct experiments. BMS did not have any intellectual input into the study design  
797 or analysis. E.A-S. reports no conflict of interests. MRM reports grants from GRAIL, Roche,  
798 Astrazeneca, BMS, Infinitopes, Immunocore, and study fees from BMS, Pfizer, MSD, Regeneron,  
799 BiolineRx, Replimune and Novartis outside of the submitted work. M.L.D. is on the SAB for  
800 Adaptimmune and Singula Bio, consults for Molecular Partners, Enara Bio, Labgenius and Astra  
801 Zeneca, and undertakes research supported by BMS, Cue Biopharma, Boehringer Ingelheim,  
802 Regeneron and Evolveimmune outside the submitted work.

803

## 804 **Ethics approval and consent to participate**

805 Informed consent was obtained for all patients. The study was in strict compliance with all institutional  
806 ethical regulations.

807  
808

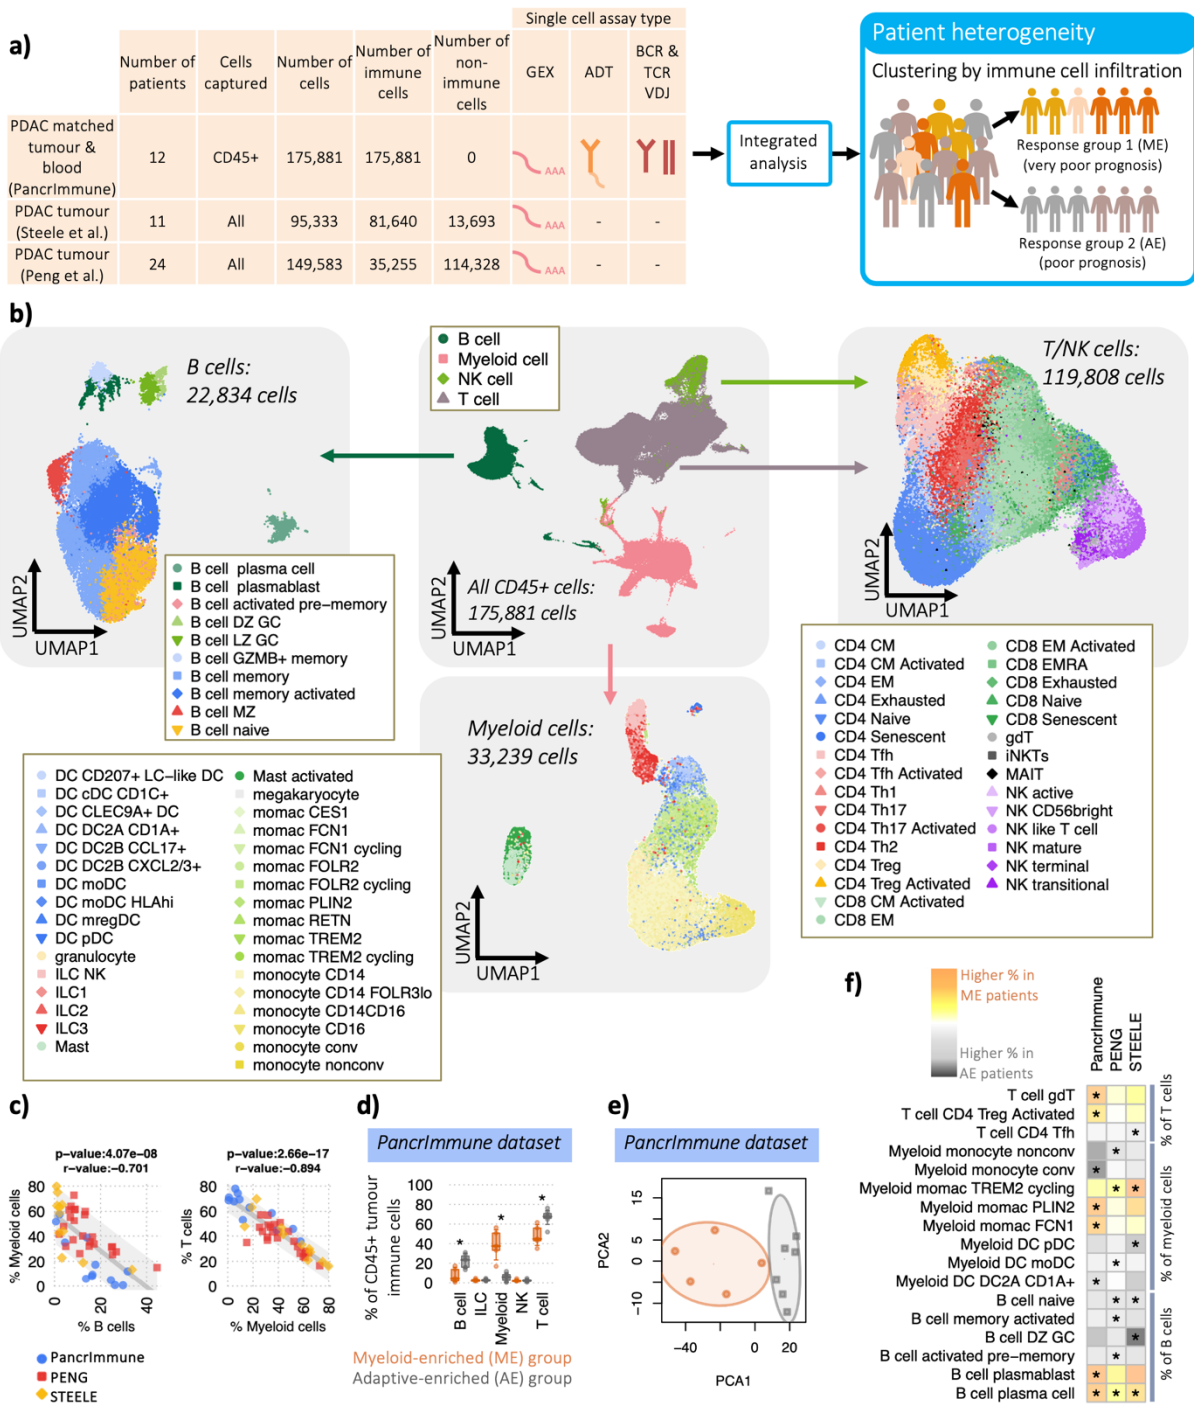

809  
810  
811  
812  
813  
814  
815  
816  
817

**Figure 1: Increased intra-tumoural lymphocyte infiltration is associated with distinct immune cellular compositions.**

a) Schematic of the datasets and analyses

b) UMAP dimensionality reduction of the immune cells from the PancriImmune dataset depicting total immune cells (centre), B cells (left), myeloid cells (bottom) and T cells (right).

c) The correlation of (left) B cells and Myeloid cells and (right) myeloid cells and T cells as a proportion of total intra-tumoural immune cells across the three datasets, coloured blue red and yellow for the PancriImmune, Peng and Steele datasets respectively.

- 818 d) Principal component analysis (PCA) of the immune cell proportions per sample, coloured orange  
819 for myeloid-enriched (ME) patient samples and grey for adaptive immune cell enriched (AE) patient  
820 samples (PancrImmune dataset).
- 821 e) The cellular proportions of the broad immune cell types between myeloid- and adaptive-enriched  
822 patients.
- 823 f) Heatmap of the differences in cellular proportions between ME and AE patient tumour samples. The  
824 colour denotes the proportional skew between ME and AE patients, and \* denotes a significant  
825 difference between ME and AE patients ( $p$ -value  $<0.05$ ). Statistical tests were performed by MANOVA.  
826

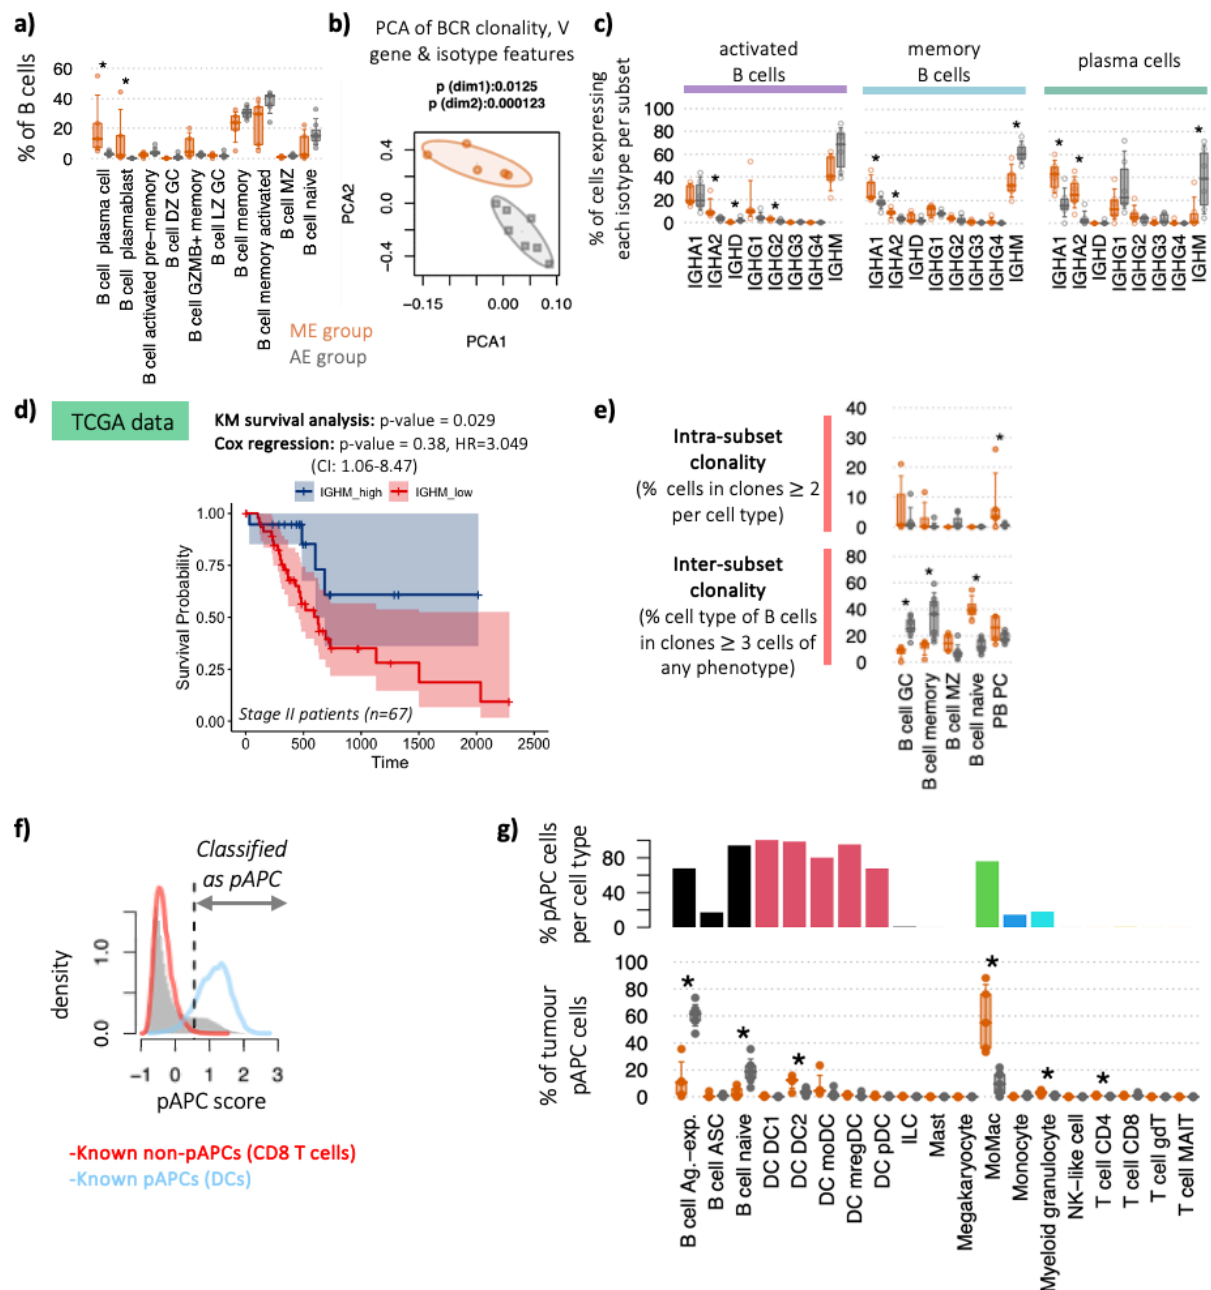

827  
828  
829  
830  
831  
832  
833  
834  
835  
836  
837  
838  
839  
840  
841

**Figure 2: Increased PDAC lymphocyte infiltration is associated with differences in B cell selection, clonal expansion and class-switch recombination.**

a) Immune cell subset proportions between ME and AE patient groups within tumour B cell subsets as a proportion of total B cells (orange represents ME patients and grey represents AE patients) within the PancrImmune dataset.

b) Principal component analysis (PCA) of the tumour BCR clonality, IGHV gene usages and isotype usages, coloured by patient group.

c) The proportions of tumour B cells within activated, memory and plasma cells expressing each isotype, coloured by patient group.

d) Clonality of the tumour B cell subpopulations between the ME and AE patient groups via two measures: (top) *intra-subset clonality* (the percentage of cells in clones  $>2$  cells per subset, measuring the clonality within the subset thus reflecting specific cell populations which are actively expanding), and (bottom) *inter-subset clonality* (the percentage of cells of each cell type as members of clones  $>3$  cells across all populations, demonstrating, this indicates cells within each B cell subset that may be

842 members of larger clones than span multiple phenotypes, reflecting B cell plasticity of expanding  
843 clones).

844 e) Survival plot for high vs low IGHM expression with a p-value for Kaplan–Meier (KM) plot (log-rank  
845 test) and Cox proportional hazards model (Wald test). HR = hazard ratio, CI = confidence interval.

846 f) Histogram of the professional antigen presentation (pAPC) scores for (grey) all tumour cells, (red)  
847 tumour CD8 T cells and (blue) tumour DCs. Dashed line indicates the threshold for classification of  
848 pAPCs.

849 g) (top) Bar chart of the percentages of pAPCs comprising each cell type, and (bottom) the proportion  
850 of tumour pAPCs comprising each cell type between patient groups.

851 All analyses in this figure were performed on the PancrImmune dataset. \* denotes p-values<0.05, and  
852 tests were performed by MANOVA.

853

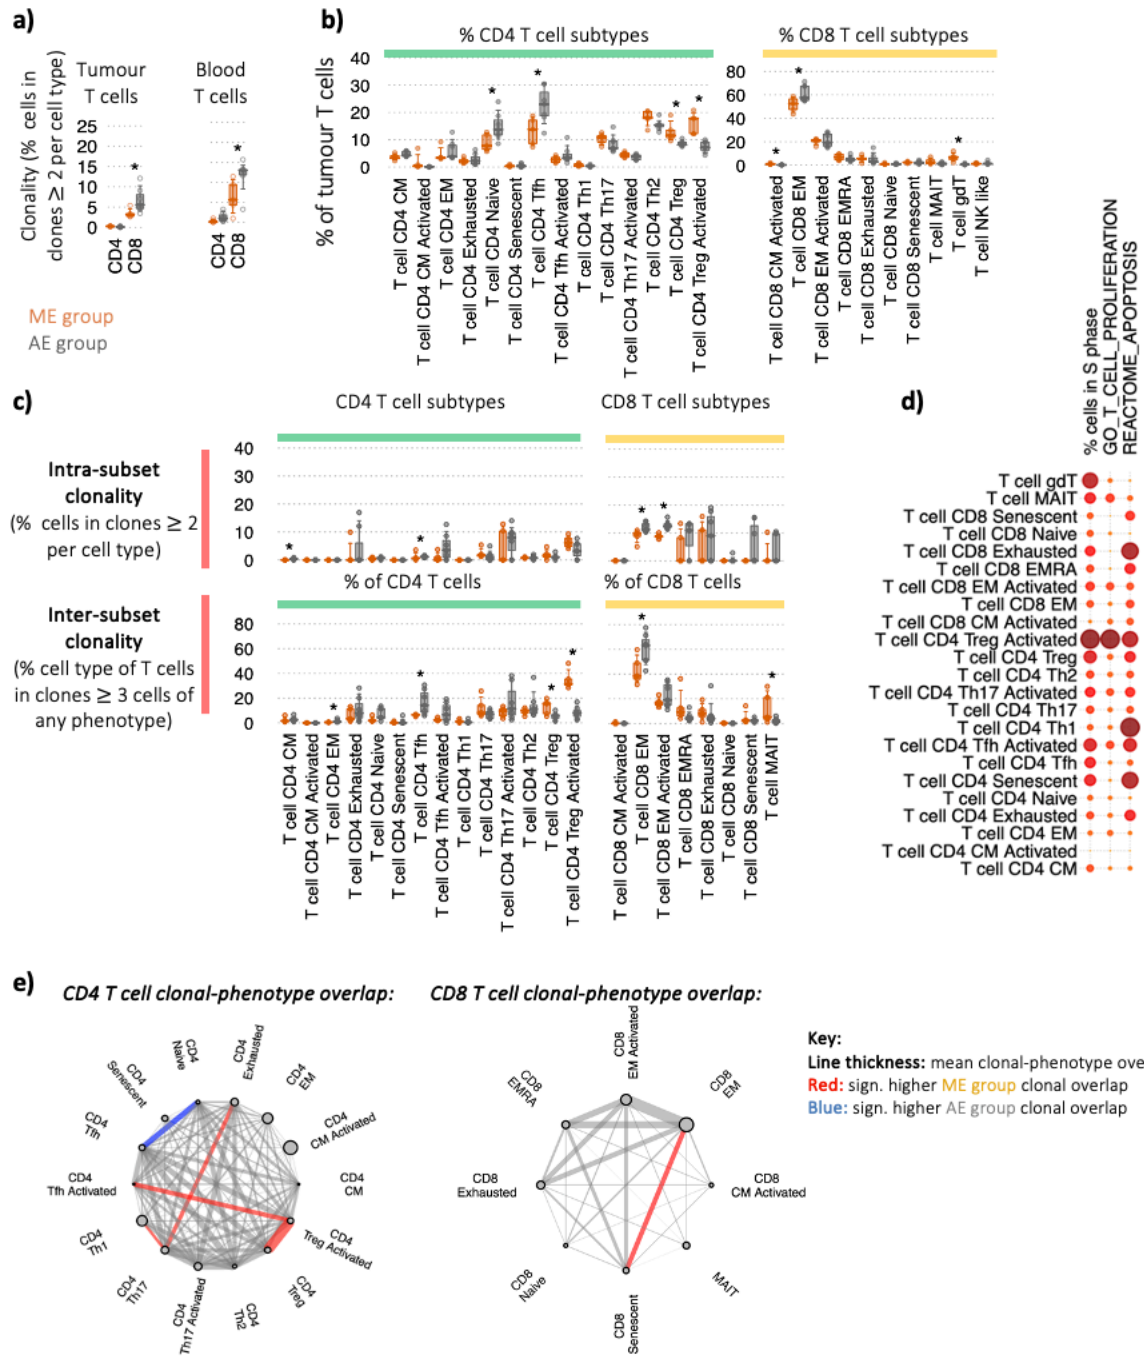

854

855

856

857

858

859

860

861

862

863

864

865

**Figure 3: Increased PDAC lymphocyte infiltration is associated with increased activated Treg clonality and proliferation.**

a) The clonality of tumour T cells within total CD4 and CD8 T cell populations, measured by percentage of clones consisting of  $>2$  cells. Orange represents ME patients and grey represents AE patients.

b) Immune cell subset proportions between ME and AE patient groups within tumour T cell subsets as a proportion of total CD4 and CD8 T cells, respectively.

c) Clonality of the tumour T cell subpopulations between the ME and AE patient groups via two measures: (top) *intra-subset clonality* (the percentage of cells in clones  $>2$  cells per subset, measuring the clonality within the subset thus reflecting specific cell populations which are actively expanding), and (bottom) *inter-subset clonality* (the percentage of cells of each cell type as members of clones  $>3$  cells across all populations, demonstrating, this indicates cells within each T cell subset that may be



866 members of larger clones than span multiple phenotypes, reflecting T cell plasticity of expanding  
867 clones).

868 d) The relative mean percentage cells within predicted S phase, mean Gene Ontology (GO) T cell  
869 proliferation score, and mean REACTOME apoptosis scores per cell between tumour T cell  
870 populations. The circle size indicates the relative means between cell types.

871 e) Level of tumour TCR clonal sharing between (left) CD4 T cell and (right) CD8 T cell populations. Each  
872 line represents a sharing of TCR clones between cell types, and the line thickness denotes the mean  
873 relative level of sharing. A red line denotes that the clonal sharing between the corresponding cell  
874 types is significantly higher in the ME patients than AE, and a blue line denotes that the clonal sharing  
875 between the corresponding cell types is significantly lower in the ME patients than AE. The size of the  
876 dot represents the mean relative frequency of the corresponding cell type.

877 All analyses in this figure were performed on the PancrImmune dataset. \* denotes p-values<0.05, and  
878 tests were performed by MANOVA.

879

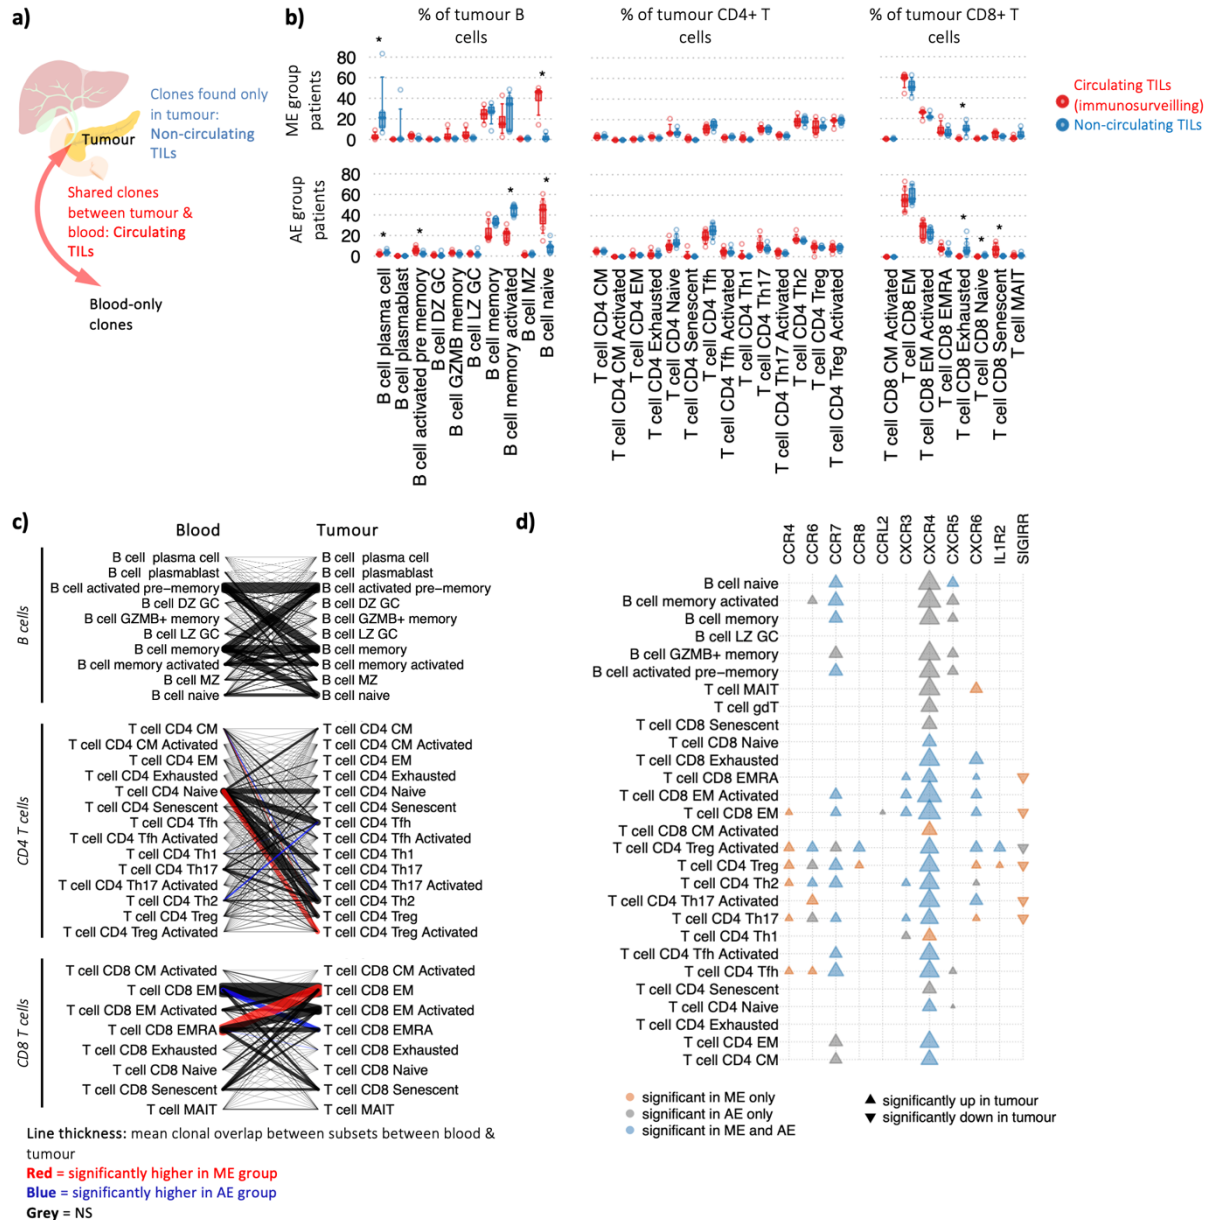

880

881

882 **Figure 4: Immunosurveillance and resident B and T cell clones are phenotypically distinct.**

883 a) Schematic of clonal definitions: B and T cells clones that are (a) shared between blood and tumour

884 (recirculating clones), (b) tumour-only (non-circulating TIL clones) and (c) blood-only clones.

885 b) The percentage of tumour B cells, CD4 T cells, and CD8 T cells that (red) have clonal members in the

886 blood or (blue) no clonal members in the blood for the ME patients (top) and AE patients (bottom).

887 c) Clonal migration overlap plot, showing the linked phenotypes between blood and tumour B and T

888 cells from shared clones between sites. Line thickness represents the relative means calculated over

889 each patient. Red lines indicate that the corresponding clonal sharing between the corresponding cell

890 types is significantly higher in the ME patients than AE, and a blue line denotes that the clonal sharing

891 between the corresponding cell types is significantly lower in the ME patients than AE.

892 d) Heatmap of DGE between blood and tumour biopsy between ME and AE patients per lymphocyte

893 cell type. For each chemokine receptor and for each cell type, the upwards triangle denotes significant

894 elevation of expression in tumour compared to blood and downwards triangle denotes significant

895 reduction of expression in tumour compared to blood. The triangles are coloured orange, grey and

896 blue if the significance is observed in ME patients only, AE patients only or both, respectively. The sizes

897 of the triangles denotes relative mean expression. All analyses in this figure were performed on the  
898 PancrImmune dataset. \* denotes p-values<0.05, and tests were performed by MANOVA.  
899

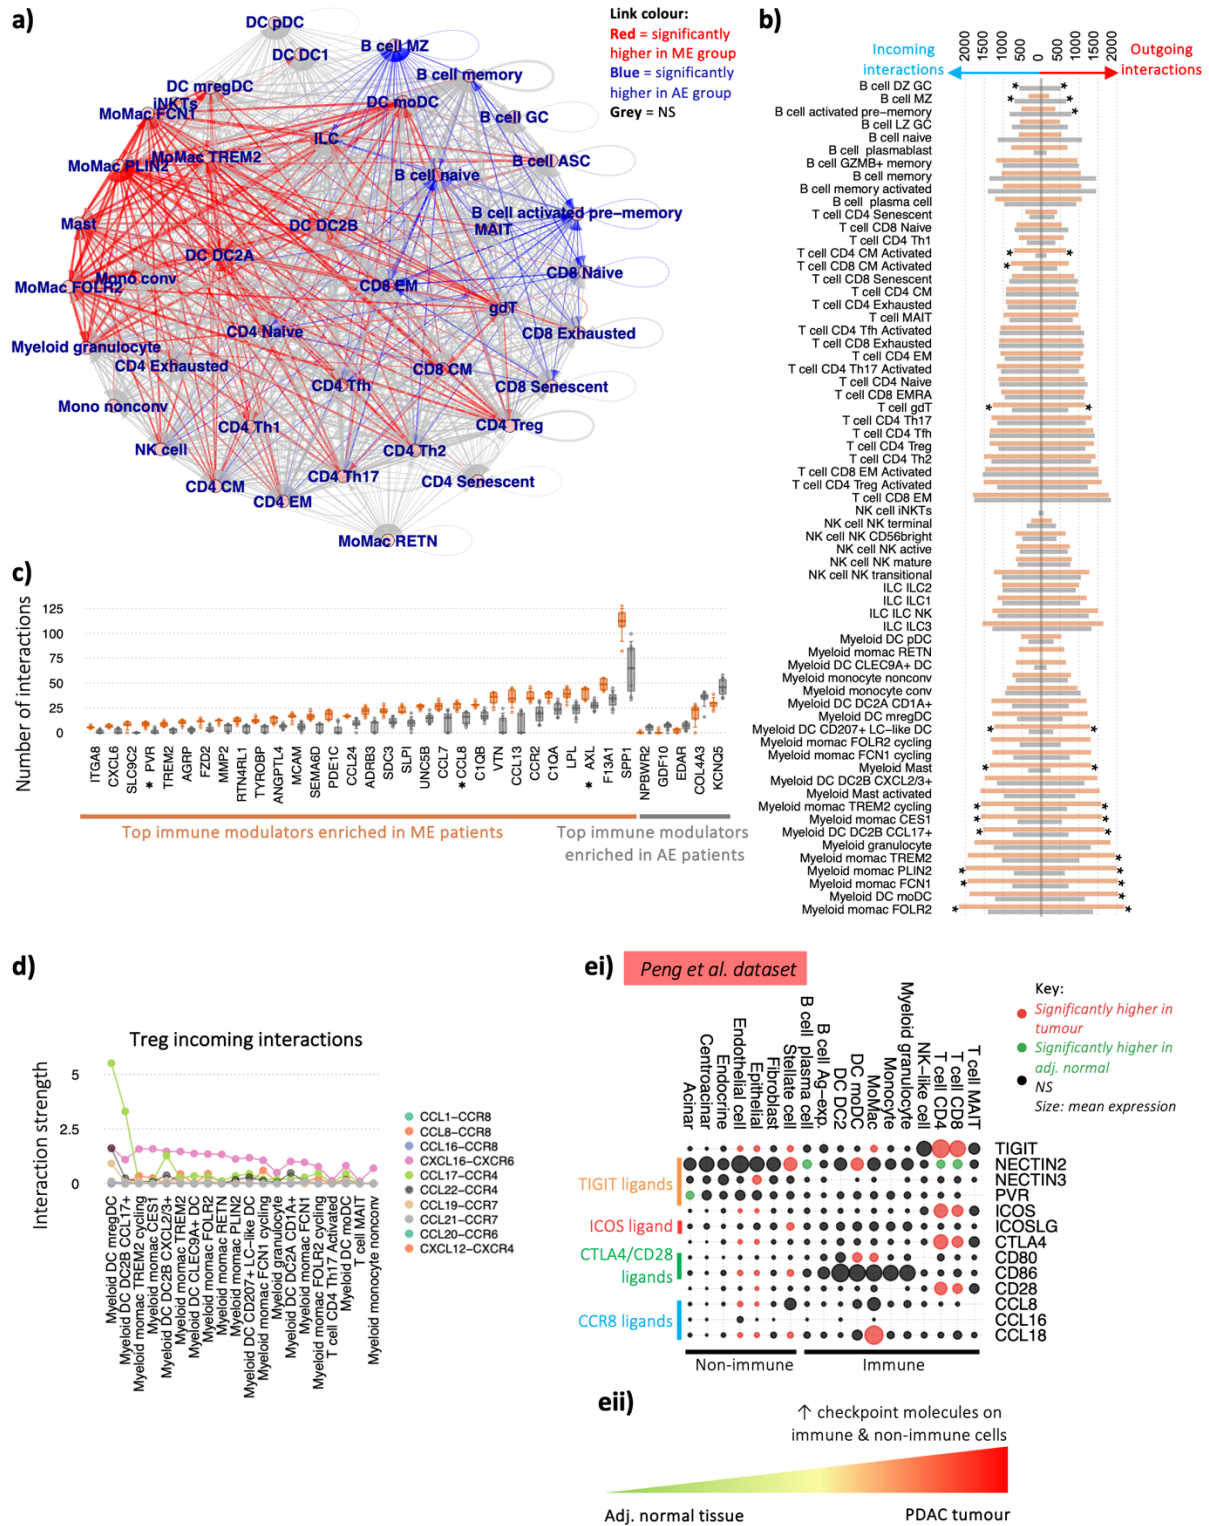

900  
901  
902  
903  
904  
905  
906  
907

**Figure 5. Distinct regulatory mechanisms between patients with different immune cell infiltration.**  
a) Intercellular immune modulator communication network between intra-tumoural immune cells, where each line thickness corresponds to the mean number of receptor-ligand interactions between the corresponding pair of cell types. A red line denotes that the number of receptor ligand-interactions between the corresponding cell types is significantly higher in the ME patients than AE, and a blue line denotes that the number of receptor ligand-interactions between the corresponding cell types is significantly lower in the ME patients than AE.

908 b) Quantification of the number of incoming and outgoing interactions per cell type split by ME and  
909 AE patient groups, calculated as a sum of all receptor-ligand pairs identified between all cell types.  
910 Bars indicate the means for each patient group, and \* denotes p-values<0.05 between groups.  
911 c) The number of interactions of the top 30 significantly enriched cytokines in ME patients and all the  
912 top 30 significantly enriched cytokines, chemokines and immune-modulators in AE patients (p-  
913 values<0.05).  
914 d) The top 20 ranked interaction strengths between the key tumour Treg receptors (CCR4, CCR8,  
915 CXCR4 and CXCR6) and their ligands per cell type, coloured by receptor-ligand interaction type.  
916 ei) Differential checkpoint gene expression between adjacent normal pancreatic tissue and PDAC  
917 in both immune and non-immune cell compartments (using the Peng et al. dataset). Red circles  
918 indicate significantly higher expression in the tumour and green circles indicate significantly higher  
919 expression in the adjacent normal pancreatic tissue. Circle size indicates relative mean gene  
920 expression per cell type.  
921 ii) Schematic of the checkpoint expression landscape between healthy and pancreatic tumour tissue.  
922 All analyses in this figure were performed on the PancrImmune dataset unless otherwise indicated. \*  
923 denotes p-values<0.05, and tests were performed by MANOVA.  
924  
925  
926  
927  
928

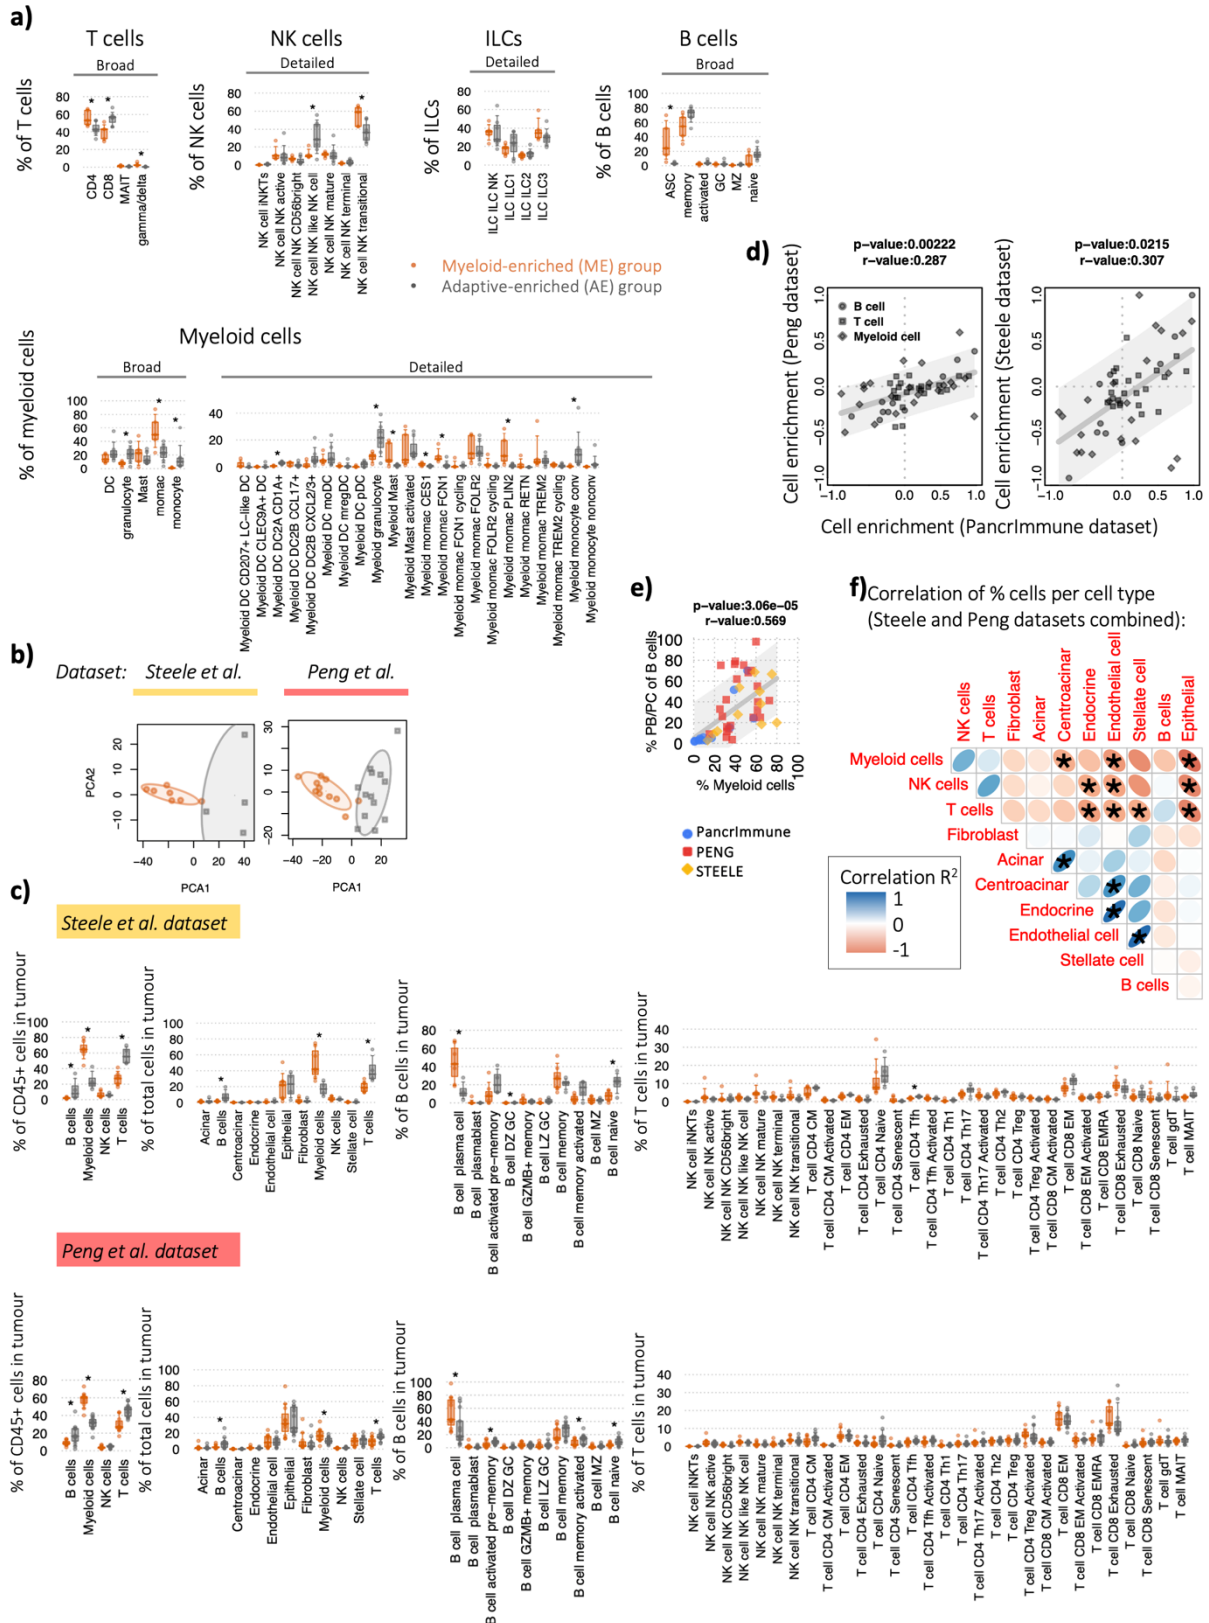

929

930

**Supplemental Figure 1.**

931

a) Tumour immune cell subset proportions between ME and AE patient groups within cellular subsets as a proportion within the PancriImmune dataset. Orange represents ME patients and grey represents AE patients.

932

b) Principal component analysis (PCA) based on PDAC CD45+ immune cell infiltration proportions for the Steele and Peng datasets, coloured by patient group.

933

934

935

936 c) Cell subset proportions between ME and AE patient groups within cellular subsets as a proportion  
937 for the Steele and Peng datasets. Orange represents ME patients and grey represents AE patients.  
938 d) Correlation of the cell enrichment between ME and AE patients between the PancrImmune tumour  
939 and (left) Peng and (right) Steele datasets. P-values and  $R^2$  values provided above each plot.  
940 e) The correlation of myeloid cells as a proportion of total intra-tumoural immune cells with  
941 plasmablasts and plasma cells as a proportion of total B cells, coloured blue, red and yellow for the  
942 PancrImmune, Peng and Steele datasets respectively.  
943 f) Correlation of immune and non-immune cell proportions from the Steele and Peng datasets  
944 combined as a proportion of total cells. The blue positively sloped ellipses represent positive  
945 correlations and negatively sloped ellipses represent negative correlations, and \* denotes significant  
946 correlations  $p$ -values $<0.05$ .  
947 In panels (a) and (c), \* denotes  $p$ -values $<0.05$ , and tests were performed by MANOVA.  
948  
949

950  
951

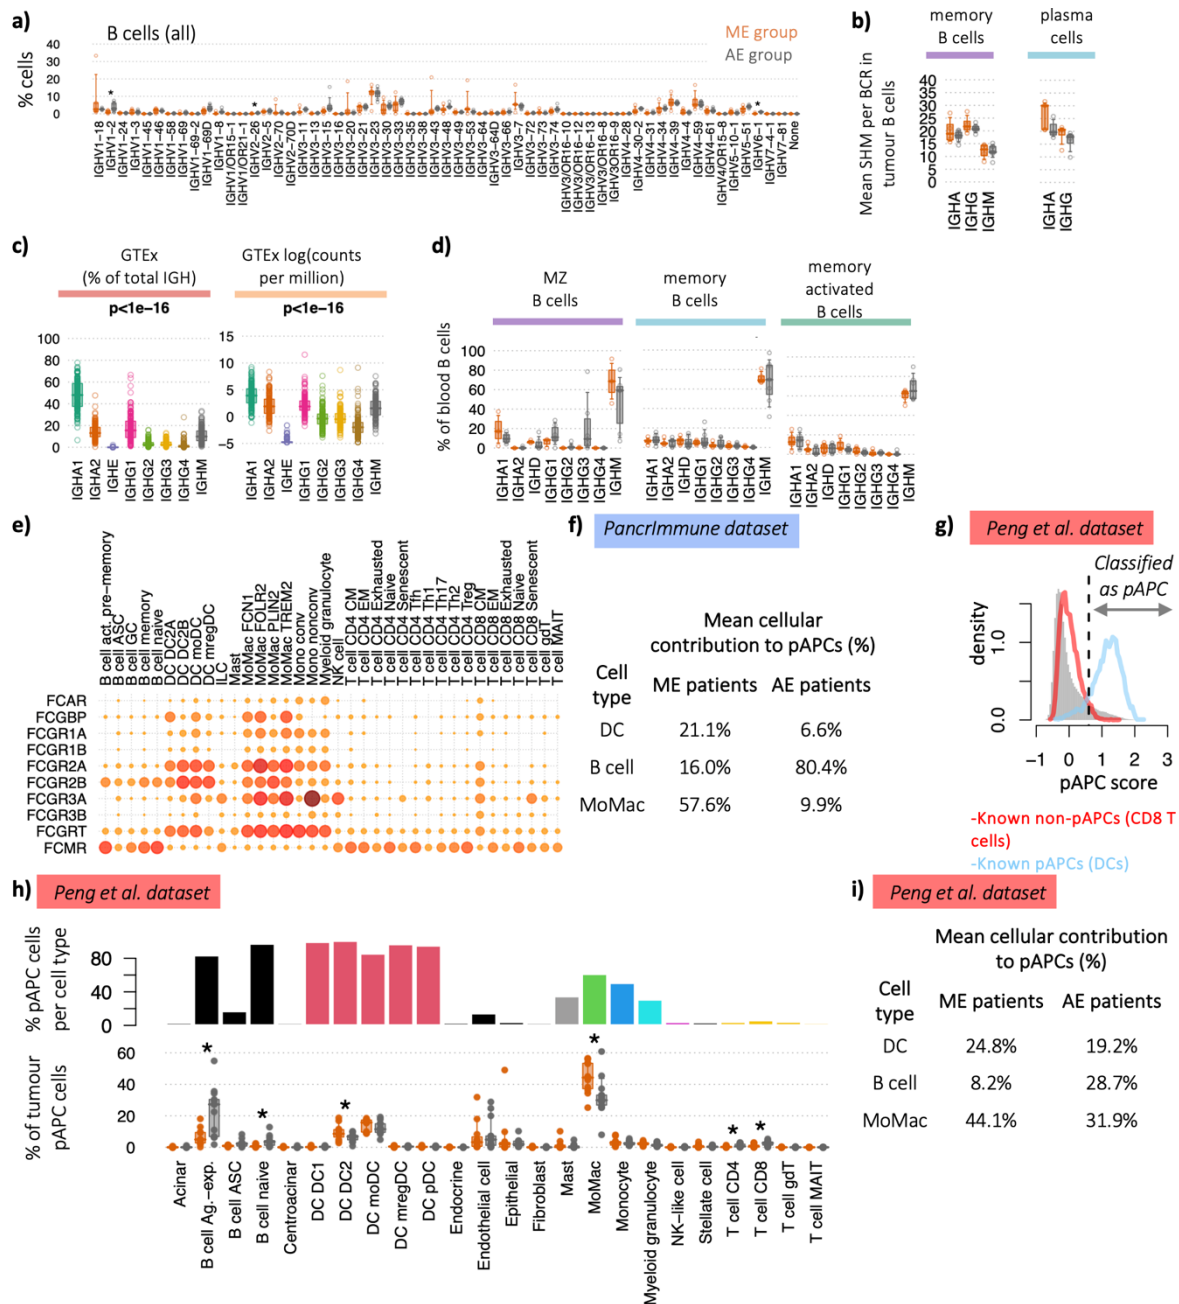

952

953

### Supplemental Figure 2.

954

a) IGHV proportions between ME and AE patient groups of total tumour B cells within the PancriImmune dataset. Orange represents ME patients and grey represents AE patients.

955

b) Mean SHM levels between ME and AE patient groups for tumour memory B cells and plasma cells within the PancriImmune dataset.

956

c) Isotype usages (left) as a proportion of total IGH and (right) counts per million in healthy pancreatic tissue from the GTEx RNA-seq dataset. P-values generated by ANOVA.

957

d) The proportions of blood B cells within activated, memory and plasma cells expressing each isotype, coloured by patient group using the PancriImmune dataset.

958

e) The relative levels of the FC receptor gene expression between intra-tumoural cell types, where larger circle size indicates higher expression using the PancriImmune dataset.

959

f) Table of the mean cellular contribution to pAPCs between ME and AE patient groups, using the PancriImmune dataset.

960

961

962

963

964

965



- 966 g) Histogram of the professional antigen presentation (pAPC) scores for (grey) all cells, (red) CD8 T  
967 cells and (blue) DCs, using the Peng dataset. Dashed line indicates the threshold for classification of  
968 pAPCs.
- 969 h) (top) Barchart of the percentages of pAPCs comprising each cell type, and (bottom) the proportion  
970 of pAPCs comprising each cell type between patient groups, using the Peng dataset.
- 971 i) Table of the mean cellular contribution to pAPCs between ME and AE patient groups, using the Peng  
972 dataset.
- 973 \* denotes p-values<0.05, and tests were performed by MANOVA.
- 974

975

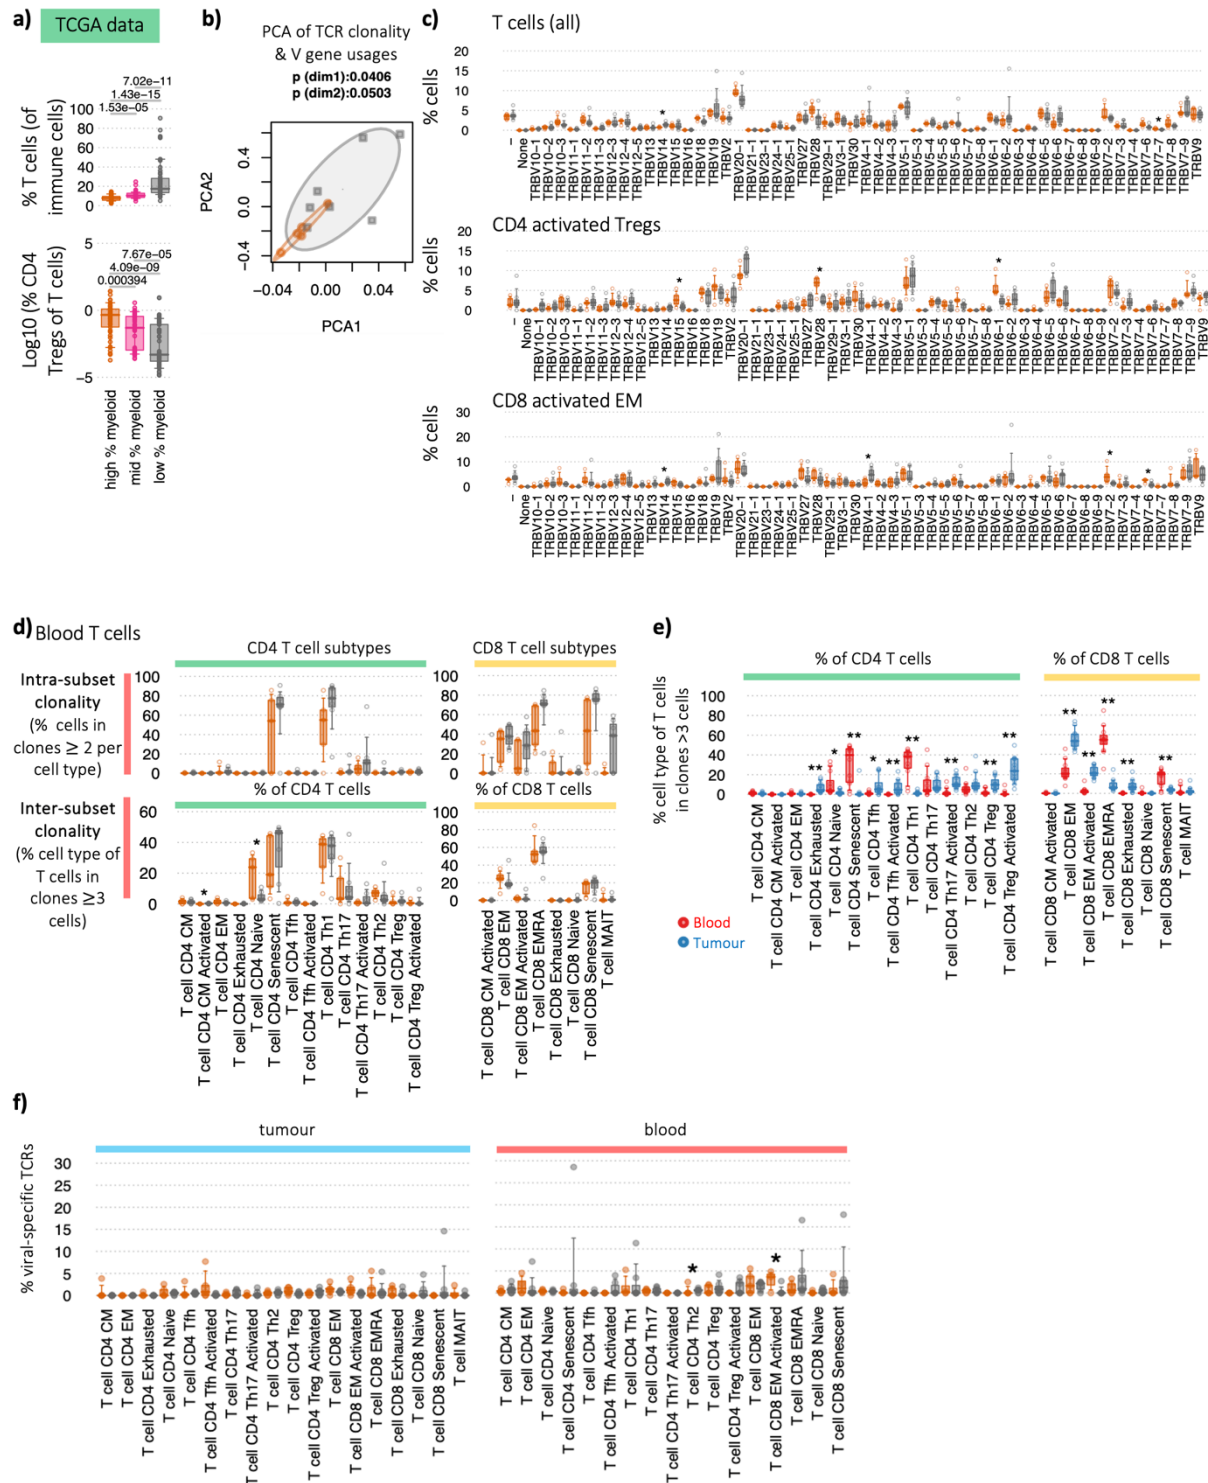

976

977

978

979

980

981

982

983

984

985

### Supplemental Figure 3.

a) Correlation of the Treg proportions (as a proportion of total T cells) with myeloid cell proportions (as a proportion of total immune cells). Cellular deconvolution of the PAAD TCGA dataset (n=156 patients) by BayesPrism using the PancrImmune dataset as a reference. The TCGA patients were split into tertials based on myeloid cell proportions (low % myeloid cells = lowest 33% of patients, mid % myeloid cells = mid 33% of patients, high % myeloid cells = highest 33% of patients). P-values calculated by Wilcoxon test.

b) Principal component analysis (PCA) of the TCR clonality and TRB V gene usages, coloured by patient group.

986 c) TRBV proportions between ME and AE patient groups of total tumour T cells, activated Tregs and  
987 CD8 activated EM T cells within the PancrImmune dataset. Orange represents ME patients and grey  
988 represents AE patients.  
989 d) Clonality of the blood T cell subpopulations between the ME and AE patient groups via two  
990 measures: (top) *intra-subset clonality* (the percentage of cells in clones >2 cells per subset, measuring  
991 the clonality within the subset thus reflecting specific cell populations which are actively expanding),  
992 and (bottom) *inter-subset clonality* (the percentage of cells of each cell type as members of clones >3  
993 cells across all populations, demonstrating, this indicates cells within each T cell subset that may be  
994 members of larger clones than span multiple phenotypes, reflecting T cell plasticity of expanding  
995 clones).  
996 e) The *inter-subset clonality* between tumour (blue) and blood (red) T cells.  
997 f) The percentage of TCRs from each T cell subset that match to anti-viral T cell clones, coloured by  
998 patient group.  
999 All analyses in this figure were performed on the PancrImmune dataset. \* denotes p-values<0.05, and  
1000 tests were performed by MANOVA.  
1001

1002

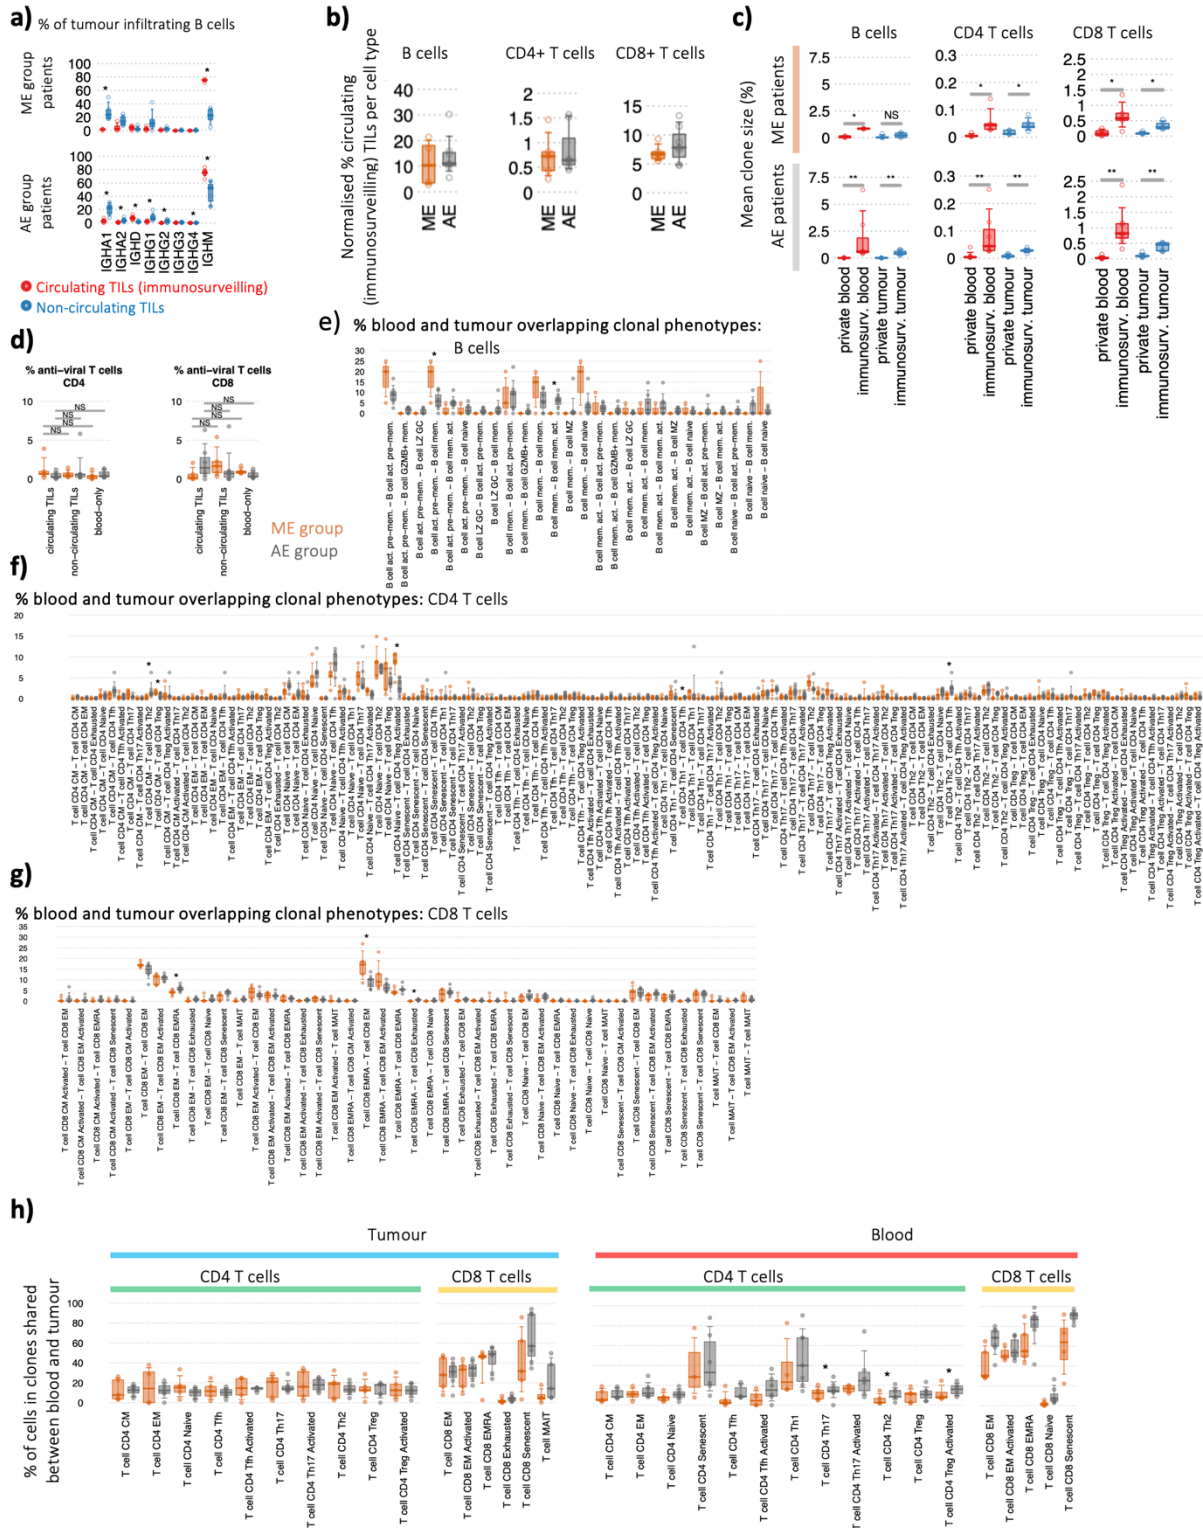

**Supplemental Figure 4.**

a) The isotype usage percentages of tumour B cells have clonal members in the blood or (blue) no clonal members in the blood between ME patients (top) and AE patients (bottom).

b) The normalised level of re-circulating tumour clones between ME and AE patients B and T cell clones.

c) The mean clone sizes per patient between blood and tumour re-circulating and private clones, plotted between ME and AE patient groups. \* denotes p-values<0.05, \*\* p-values<0.005.

1003

1004

1005

1006

1007

1008

1009

1010

1011 d) The percentage of TCRs that match to anti-viral T cell clones between re-circulating and private  
1012 clones, coloured by patient group.  
1013 The relative proportions of clones overlapping blood and tumour split by phenotype for e) B cells, f)  
1014 CD4 T cells, and g) CD8 T cells, coloured by patient group  
1015 h) The percentage of cells in clones shared between blood and tumour, split by source and coloured  
1016 by patient group.  
1017 All analyses in this figure were performed on the PancrImmune dataset. Unless otherwise mentioned,  
1018 \* denotes p-values<0.05 and tests were performed by MANOVA.  
1019  
1020  
1021

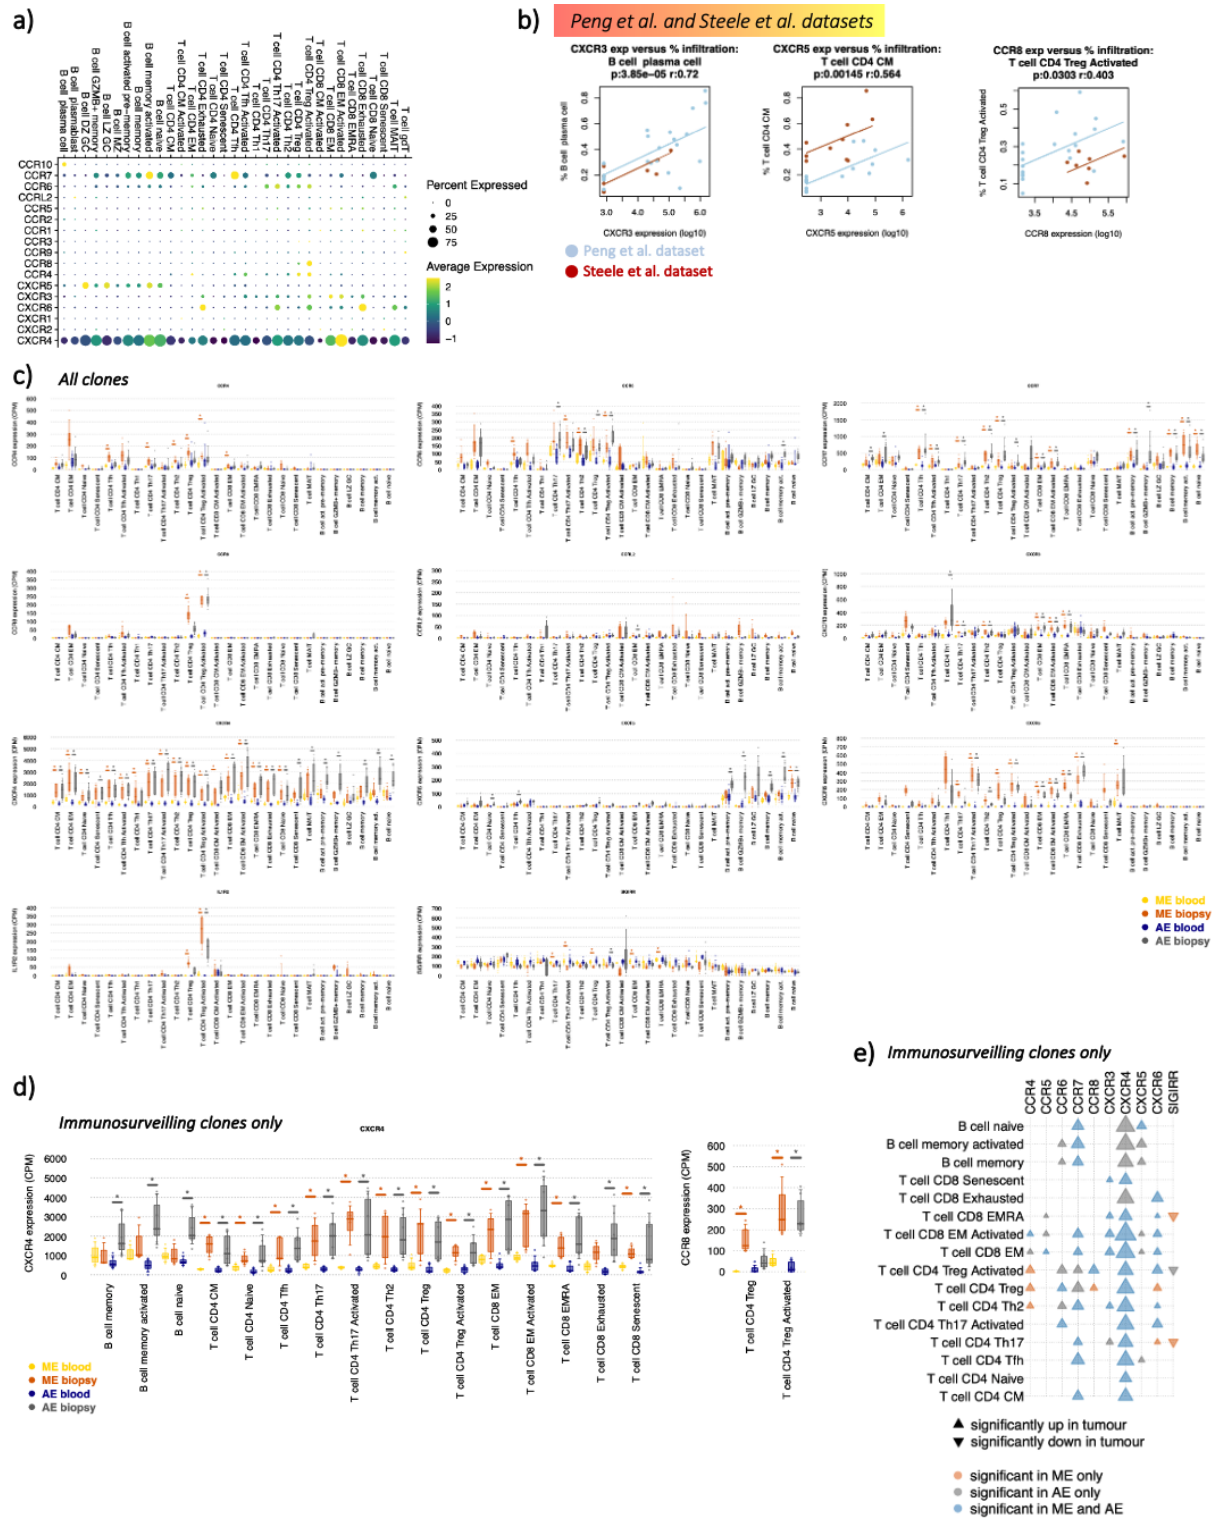

1022  
1023  
1024  
1025  
1026  
1027  
1028

### Supplemental Figure 5.

a) Gene expression dot plot of the chemokine receptor gene expression across lymphocytes.  
 b) Correlations between immune cell proportion within tumour microenvironment and mean chemokine expression of that cell type. P-values and  $r^2$  values were computed using the repeated measures correlation from rmcrr package in R, with the patients from the Peng et al. data in blue and the Steele et al. data in red.

1029 c) The mean gene expression of key lymphocyte chemokine receptors between all blood and tumour  
1030 biopsy between ME and AE patients for each cell type. Each point represents the mean expression per  
1031 patient per cell group.  
1032 d) The mean gene expression of key CXCR4 and CCR8 between blood and tumour biopsy between ME  
1033 and AE patients for each cell type for only immunosurveilling clones (clones shared between blood  
1034 and tumour). Each point represents the mean expression per patient per cell group. \* denotes p-  
1035 values <0.05 as determined by DGE.  
1036 e) Heatmap of DGE between blood and tumour biopsy for immunosurveilling clones (clones shared  
1037 between blood and tumour) between ME and AE patients. For each chemokine receptor and for each  
1038 cell type, the upwards triangle denotes significant elevation of expression in tumour compared to  
1039 blood and downwards triangle denotes significant reduction of expression in tumour compared to  
1040 blood. The triangles are coloured orange, grey and blue if the significance is observed in ME patients  
1041 only, AE patients only or both, respectively. The sizes of the triangles denote relative mean expression.  
1042 All analyses in this figure were performed on the PancrImmune dataset. Unless otherwise indicated,  
1043 \* denotes p-values<0.05 and tests were performed by MANOVA.

a) Expression of key Treg cytokine receptors and their ligands

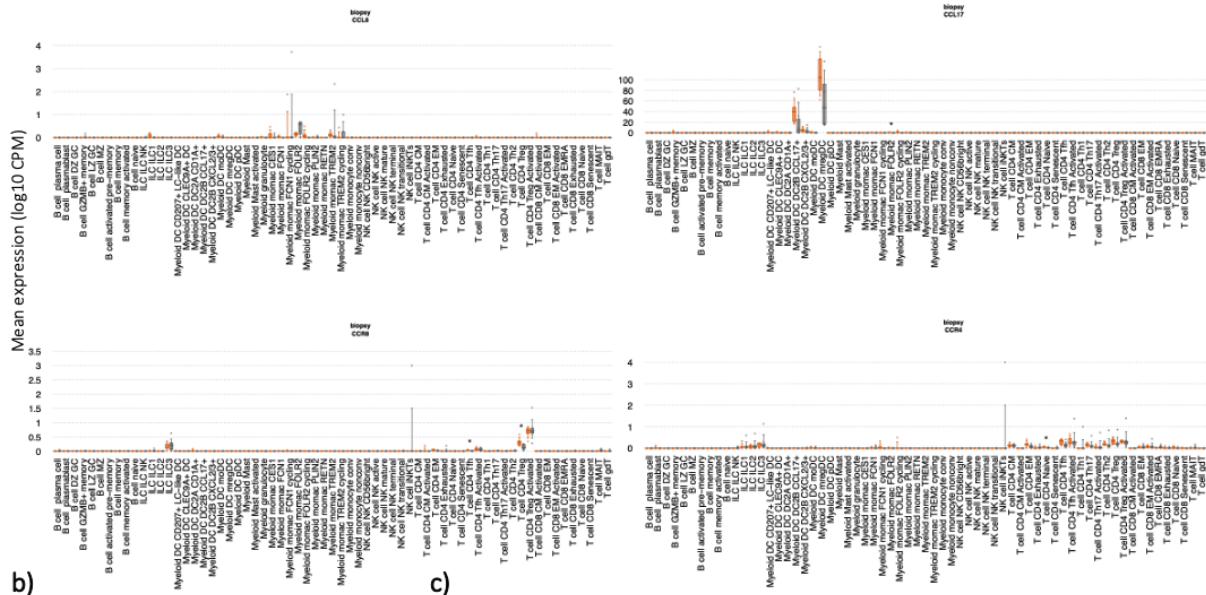

b)

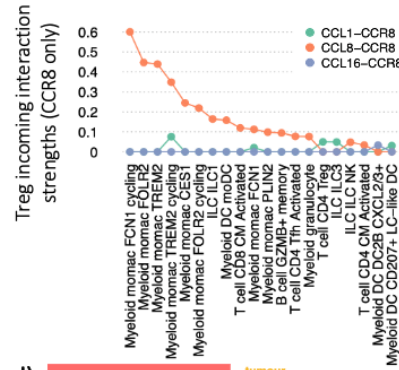

c)

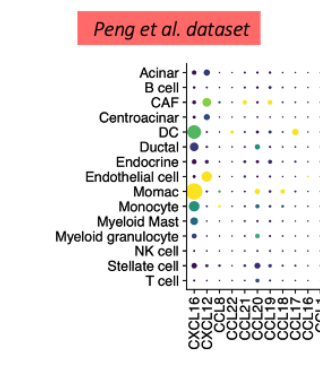

d)

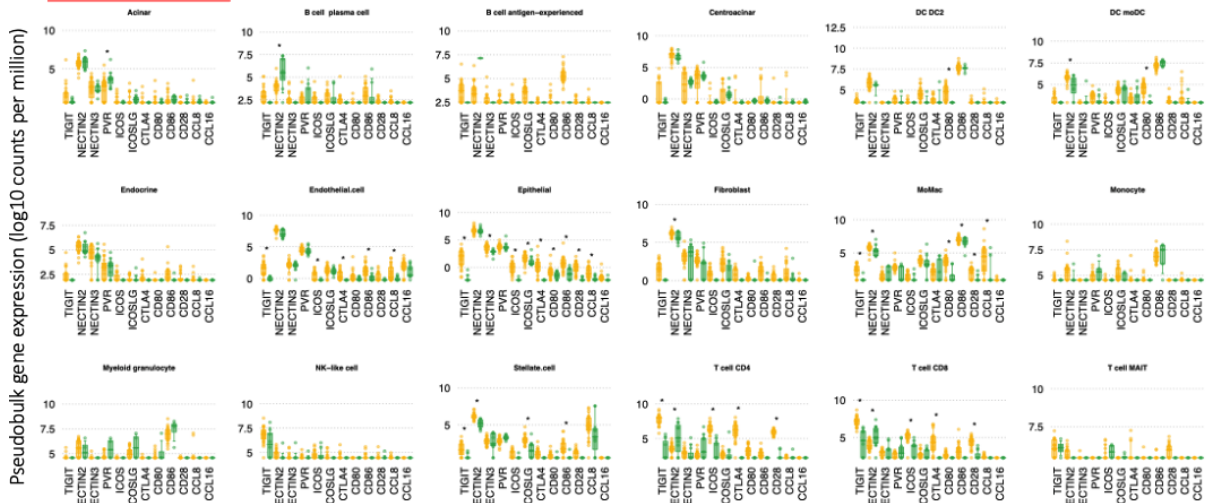

1044  
1045  
1046  
1047  
1048  
1049  
1050  
1051  
1052

**Supplemental Figure 6.**

a) The mean normalised gene expression per sample of key Treg chemokines and their receptors across cell types within the tumour from the PancrImmune dataset. \* denotes p-values<0.05 and tests were performed by MANOVA.

b) The top 20 ranked interaction strengths between the exclusive Treg receptor CCR8 and its ligands per cell type, coloured by receptor-ligand interaction type.



1053 c) The relative expression of key lymphocyte chemokines across both immune and non-immune cells,  
1054 using the Peng dataset. The circle colour denotes relative mean expression level (yellow indicates  
1055 higher levels) and size indicates percentage of cells expressing each gene.  
1056 d) Boxplots differential checkpoint gene expression between adjacent normal pancreatic tissue and  
1057 PDAC in both immune and non-immune cell compartments using the Peng dataset.  
1058  
1059  
1060

1061 **References**

- 1062 1 Siegel, R. L., Miller, K. D. & Jemal, A. Cancer statistics, 2020. *CA Cancer J Clin* **70**,  
1063 7-30 (2020). <https://doi.org/10.3322/caac.21590>
- 1064 2 O'Reilly, E. M. *et al.* Durvalumab With or Without Tremelimumab for Patients With  
1065 Metastatic Pancreatic Ductal Adenocarcinoma: A Phase 2 Randomized Clinical Trial.  
1066 *JAMA Oncol* **5**, 1431-1438 (2019). <https://doi.org/10.1001/jamaoncol.2019.1588>
- 1067 3 Bockorny, B. *et al.* BL-8040, a CXCR4 antagonist, in combination with  
1068 pembrolizumab and chemotherapy for pancreatic cancer: the COMBAT trial. *Nat Med*  
1069 **26**, 878-885 (2020). <https://doi.org/10.1038/s41591-020-0880-x>
- 1070 4 Biasci, D. *et al.* CXCR4 inhibition in human pancreatic and colorectal cancers induces  
1071 an integrated immune response. *Proc Natl Acad Sci U S A* **117**, 28960-28970 (2020).  
1072 <https://doi.org/10.1073/pnas.2013644117>
- 1073 5 Padron, L. J. *et al.* Sotigalimab and/or nivolumab with chemotherapy in first-line  
1074 metastatic pancreatic cancer: clinical and immunologic analyses from the randomized  
1075 phase 2 PRINCE trial. *Nat Med* **28**, 1167-1177 (2022). <https://doi.org/10.1038/s41591-022-01829-9>
- 1076 6 Rojas, L. A. *et al.* Personalized RNA neoantigen vaccines stimulate T cells in pancreatic  
1077 cancer. *Nature* **618**, 144-150 (2023). <https://doi.org/10.1038/s41586-023-06063-y>
- 1078 7 Sivakumar, S. *et al.* Activated Regulatory T-Cells, Dysfunctional and Senescent T-  
1079 Cells Hinder the Immunity in Pancreatic Cancer. *Cancers (Basel)* **13** (2021).  
1080 <https://doi.org/10.3390/cancers13081776>
- 1081 8 de Santiago, I. *et al.* Immunophenotypes of pancreatic ductal adenocarcinoma: Meta-  
1082 analysis of transcriptional subtypes. *Int J Cancer* **145**, 1125-1137 (2019).  
1083 <https://doi.org/10.1002/ijc.32186>
- 1084 9 Jainarayanan, A. *et al.* Pseudotime dynamics of T cells in pancreatic ductal  
1085 adenocarcinoma inform distinct functional states within the regulatory and cytotoxic T  
1086 cells. *iScience* **26**, 106324 (2023). <https://doi.org/10.1016/j.isci.2023.106324>
- 1087 10 Peng, J. *et al.* Single-cell RNA-seq highlights intra-tumoral heterogeneity and  
1088 malignant progression in pancreatic ductal adenocarcinoma. *Cell Res* **29**, 725-738  
1089 (2019). <https://doi.org/10.1038/s41422-019-0195-y>
- 1090 11 Mi, H. *et al.* Quantitative Spatial Profiling of Immune Populations in Pancreatic Ductal  
1091 Adenocarcinoma Reveals Tumor Microenvironment Heterogeneity and Prognostic  
1092 Biomarkers. *Cancer Res* **82**, 4359-4372 (2022). <https://doi.org/10.1158/0008-5472.CAN-22-1190>
- 1093 12 Steele, N. G. *et al.* Multimodal Mapping of the Tumor and Peripheral Blood Immune  
1094 Landscape in Human Pancreatic Cancer. *Nat Cancer* **1**, 1097-1112 (2020).  
1095 <https://doi.org/10.1038/s43018-020-00121-4>
- 1096 13 Schalck, A. *et al.* Single-Cell Sequencing Reveals Trajectory of Tumor-Infiltrating  
1097 Lymphocyte States in Pancreatic Cancer. *Cancer Discov* **12**, 2330-2349 (2022).  
1098 <https://doi.org/10.1158/2159-8290.CD-21-1248>
- 1099 14 Brouwer, T. P. *et al.* Local and systemic immune profiles of human pancreatic ductal  
1100 adenocarcinoma revealed by single-cell mass cytometry. *J Immunother Cancer* **10**  
1101 (2022). <https://doi.org/10.1136/jitc-2022-004638>
- 1102 15 Liudahl, S. M. *et al.* Leukocyte Heterogeneity in Pancreatic Ductal Adenocarcinoma:  
1103 Phenotypic and Spatial Features Associated with Clinical Outcome. *Cancer Discov* **11**,  
1104 2014-2031 (2021). <https://doi.org/10.1158/2159-8290.CD-20-0841>
- 1105 16 Aziz, H. M. *et al.* Spatial genomics reveals a high number and specific location of B  
1106 cells in the pancreatic ductal adenocarcinoma microenvironment of long-term  
1107 survivors. *Front Immunol* **13**, 995715 (2022).  
1108 <https://doi.org/10.3389/fimmu.2022.995715>
- 1109  
1110

- 1111 17 Luksza, M. *et al.* Neoantigen quality predicts immunoediting in survivors of pancreatic  
1112 cancer. *Nature* **606**, 389-395 (2022). [https://doi.org:10.1038/s41586-022-04735-9](https://doi.org/10.1038/s41586-022-04735-9)
- 1113 18 Bailey, P. *et al.* Genomic analyses identify molecular subtypes of pancreatic cancer.  
1114 *Nature* **531**, 47-52 (2016). [https://doi.org:10.1038/nature16965](https://doi.org/10.1038/nature16965)
- 1115 19 Yanguas, A. *et al.* ICAM-1-LFA-1 Dependent CD8+ T-Lymphocyte Aggregation in  
1116 Tumor Tissue Prevents Recirculation to Draining Lymph Nodes. *Front Immunol* **9**,  
1117 2084 (2018). [https://doi.org:10.3389/fimmu.2018.02084](https://doi.org/10.3389/fimmu.2018.02084)
- 1118 20 Fooksman, D. R. *et al.* Development and migration of plasma cells in the mouse lymph  
1119 node. *Immunity* **33**, 118-127 (2010). [https://doi.org:10.1016/j.immuni.2010.06.015](https://doi.org/10.1016/j.immuni.2010.06.015)
- 1120 21 Fooksman, D. R., Nussenzweig, M. C. & Dustin, M. L. Myeloid cells limit production  
1121 of antibody-secreting cells after immunization in the lymph node. *J Immunol* **192**, 1004-  
1122 1012 (2014). [https://doi.org:10.4049/jimmunol.1300977](https://doi.org/10.4049/jimmunol.1300977)
- 1123 22 Xu, W. *et al.* Macrophages induce differentiation of plasma cells through CXCL10/IP-  
1124 10. *J Exp Med* **209**, 1813-1823, S1811-1812 (2012).  
1125 [https://doi.org:10.1084/jem.20112142](https://doi.org/10.1084/jem.20112142)
- 1126 23 Carstens, J. L. *et al.* Spatial computation of intratumoral T cells correlates with survival  
1127 of patients with pancreatic cancer. *Nat Commun* **8**, 15095 (2017).  
1128 [https://doi.org:10.1038/ncomms15095](https://doi.org/10.1038/ncomms15095)
- 1129 24 Bashford-Rogers, R. J. M. *et al.* Analysis of the B cell receptor repertoire in six  
1130 immune-mediated diseases. *Nature* **574**, 122-126 (2019).  
1131 [https://doi.org:10.1038/s41586-019-1595-3](https://doi.org/10.1038/s41586-019-1595-3)
- 1132 25 Dominguez Conde, C. *et al.* Cross-tissue immune cell analysis reveals tissue-specific  
1133 features in humans. *Science* **376**, eabl5197 (2022).  
1134 [https://doi.org:10.1126/science.abl5197](https://doi.org/10.1126/science.abl5197)
- 1135 26 Ben Mkaddem, S., Rossato, E., Heming, N. & Monteiro, R. C. Anti-inflammatory role  
1136 of the IgA Fc receptor (CD89): from autoimmunity to therapeutic perspectives.  
1137 *Autoimmun Rev* **12**, 666-669 (2013). [https://doi.org:10.1016/j.autrev.2012.10.011](https://doi.org/10.1016/j.autrev.2012.10.011)
- 1138 27 Xia, L. *et al.* Predictable Roles of Peripheral IgM Memory B Cells for the Responses  
1139 to Anti-PD-1 Monotherapy Against Advanced Non-Small Cell Lung Cancer. *Front*  
1140 *Immunol* **12**, 759217 (2021). [https://doi.org:10.3389/fimmu.2021.759217](https://doi.org/10.3389/fimmu.2021.759217)
- 1141 28 Adler, L. N. *et al.* The Other Function: Class II-Restricted Antigen Presentation by B  
1142 Cells. *Front Immunol* **8**, 319 (2017). [https://doi.org:10.3389/fimmu.2017.00319](https://doi.org/10.3389/fimmu.2017.00319)
- 1143 29 Akbar, A. N. & Fletcher, J. M. Memory T cell homeostasis and senescence during  
1144 aging. *Curr Opin Immunol* **17**, 480-485 (2005).  
1145 [https://doi.org:10.1016/j.coi.2005.07.019](https://doi.org/10.1016/j.coi.2005.07.019)
- 1146 30 Zhao, Y., Shao, Q. & Peng, G. Exhaustion and senescence: two crucial dysfunctional  
1147 states of T cells in the tumor microenvironment. *Cell Mol Immunol* **17**, 27-35 (2020).  
1148 [https://doi.org:10.1038/s41423-019-0344-8](https://doi.org/10.1038/s41423-019-0344-8)
- 1149 31 Li, Z. *et al.* In vivo labeling reveals continuous trafficking of TCF-1+ T cells between  
1150 tumor and lymphoid tissue. *J Exp Med* **219** (2022).  
1151 [https://doi.org:10.1084/jem.20210749](https://doi.org/10.1084/jem.20210749)
- 1152 32 N, J., J, T., Sl, N. & Gt, B. Tertiary lymphoid structures and B lymphocytes in cancer  
1153 prognosis and response to immunotherapies. *Oncoimmunology* **10**, 1900508 (2021).  
1154 [https://doi.org:10.1080/2162402X.2021.1900508](https://doi.org/10.1080/2162402X.2021.1900508)
- 1155 33 Kidani, Y. *et al.* CCR8-targeted specific depletion of clonally expanded Treg cells in  
1156 tumor tissues evokes potent tumor immunity with long-lasting memory. *Proc Natl Acad*  
1157 *Sci U S A* **119** (2022). [https://doi.org:10.1073/pnas.2114282119](https://doi.org/10.1073/pnas.2114282119)
- 1158 34 Zheng, Y. *et al.* The Correlation Between SPP1 and Immune Escape of EGFR Mutant  
1159 Lung Adenocarcinoma Was Explored by Bioinformatics Analysis. *Front Oncol* **11**,  
1160 592854 (2021). [https://doi.org:10.3389/fonc.2021.592854](https://doi.org/10.3389/fonc.2021.592854)

- 1161 35 Nallasamy, P. *et al.* Pancreatic Tumor Microenvironment Factor Promotes Cancer  
1162 Stemness via SPP1-CD44 Axis. *Gastroenterology* **161**, 1998-2013 e1997 (2021).  
1163 <https://doi.org/10.1053/j.gastro.2021.08.023>
- 1164 36 Zeng, P. *et al.* Secreted phosphoprotein 1 as a potential prognostic and immunotherapy  
1165 biomarker in multiple human cancers. *Bioengineered* **13**, 3221-3239 (2022).  
1166 <https://doi.org/10.1080/21655979.2021.2020391>
- 1167 37 Dempsey, L. A. Regulatory DCs. *Nat Immunol* **21**, 488 (2020).  
1168 <https://doi.org/10.1038/s41590-020-0683-8>
- 1169 38 Rapp, M. *et al.* CCL22 controls immunity by promoting regulatory T cell  
1170 communication with dendritic cells in lymph nodes. *J Exp Med* **216**, 1170-1181 (2019).  
1171 <https://doi.org/10.1084/jem.20170277>
- 1172 39 Li, J. *et al.* Tumor Cell-Intrinsic Factors Underlie Heterogeneity of Immune Cell  
1173 Infiltration and Response to Immunotherapy. *Immunity* **49**, 178-193 e177 (2018).  
1174 <https://doi.org/10.1016/j.immuni.2018.06.006>
- 1175 40 Senturk, Z. N., Akdag, I., Deniz, B. & Sayi-Yazgan, A. Pancreatic cancer: Emerging  
1176 field of regulatory B-cell-targeted immunotherapies. *Front Immunol* **14**, 1152551  
1177 (2023). <https://doi.org/10.3389/fimmu.2023.1152551>
- 1178 41 Fridman, W. H. *et al.* B cells and tertiary lymphoid structures as determinants of tumour  
1179 immune contexture and clinical outcome. *Nat Rev Clin Oncol* **19**, 441-457 (2022).  
1180 <https://doi.org/10.1038/s41571-022-00619-z>
- 1181 42 Jang, J. E. *et al.* Crosstalk between Regulatory T Cells and Tumor-Associated Dendritic  
1182 Cells Negates Anti-tumor Immunity in Pancreatic Cancer. *Cell Rep* **20**, 558-571 (2017).  
1183 <https://doi.org/10.1016/j.celrep.2017.06.062>
- 1184 43 Principe, D. R., Timbers, K. E., Atia, L. G., Koch, R. M. & Rana, A. TGFbeta Signaling  
1185 in the Pancreatic Tumor Microenvironment. *Cancers (Basel)* **13** (2021).  
1186 <https://doi.org/10.3390/cancers13205086>
- 1187 44 Pu, N. *et al.* CD25 and TGF-beta blockade based on predictive integrated immune ratio  
1188 inhibits tumor growth in pancreatic cancer. *J Transl Med* **16**, 294 (2018).  
1189 <https://doi.org/10.1186/s12967-018-1673-6>
- 1190 45 Linterman, M. A. *et al.* Foxp3+ follicular regulatory T cells control the germinal center  
1191 response. *Nat Med* **17**, 975-982 (2011). <https://doi.org/10.1038/nm.2425>
- 1192 46 Maceiras, A. R. *et al.* T follicular helper and T follicular regulatory cells have different  
1193 TCR specificity. *Nat Commun* **8**, 15067 (2017). <https://doi.org/10.1038/ncomms15067>
- 1194 47 Shalapour, S. & Karin, M. The neglected brothers come of age: B cells and cancer.  
1195 *Semin Immunol* **52**, 101479 (2021). <https://doi.org/10.1016/j.smim.2021.101479>
- 1196 48 Shalapour, S. *et al.* Inflammation-induced IgA+ cells dismantle anti-liver cancer  
1197 immunity. *Nature* **551**, 340-345 (2017). <https://doi.org/10.1038/nature24302>
- 1198 49 de Visser, K. E., Korets, L. V. & Coussens, L. M. De novo carcinogenesis promoted by  
1199 chronic inflammation is B lymphocyte dependent. *Cancer Cell* **7**, 411-423 (2005).  
1200 <https://doi.org/10.1016/j.ccr.2005.04.014>
- 1201 50 Wei, C. *et al.* CD40 Signaling Promotes CXCR5 Expression in B Cells via  
1202 Noncanonical NF-kappaB Pathway Activation. *J Immunol Res* **2020**, 1859260 (2020).  
1203 <https://doi.org/10.1155/2020/1859260>
- 1204 51 Schioppa, T. *et al.* Regulation of the chemokine receptor CXCR4 by hypoxia. *J Exp*  
1205 *Med* **198**, 1391-1402 (2003). <https://doi.org/10.1084/jem.20030267>
- 1206 52 Erkan, M., Kurtoglu, M. & Kleeff, J. The role of hypoxia in pancreatic cancer: a  
1207 potential therapeutic target? *Expert Rev Gastroenterol Hepatol* **10**, 301-316 (2016).  
1208 <https://doi.org/10.1586/17474124.2016.1117386>

- 1209 53 Steele, M. M. *et al.* T cell egress via lymphatic vessels is tuned by antigen encounter  
1210 and limits tumor control. *Nat Immunol* **24**, 664-675 (2023).  
1211 <https://doi.org/10.1038/s41590-023-01443-y>
- 1212 54 Ozdemir, B. C. *et al.* Depletion of carcinoma-associated fibroblasts and fibrosis induces  
1213 immunosuppression and accelerates pancreas cancer with reduced survival. *Cancer*  
1214 *Cell* **25**, 719-734 (2014). <https://doi.org/10.1016/j.ccr.2014.04.005>
- 1215 55 Zhang, Y. *et al.* Regulatory T-cell Depletion Alters the Tumor Microenvironment and  
1216 Accelerates Pancreatic Carcinogenesis. *Cancer Discov* **10**, 422-439 (2020).  
1217 <https://doi.org/10.1158/2159-8290.CD-19-0958>
- 1218 56 Patterson, M. T. *et al.* Tumor-specific CD4 T cells instruct monocyte fate in pancreatic  
1219 ductal adenocarcinoma. *Cell Rep* **42**, 112732 (2023).  
1220 <https://doi.org/10.1016/j.celrep.2023.112732>
- 1221 57 Simnica, D. & Kobold, S. Neoantigen T-Cell Receptor Gene Therapy in Pancreatic  
1222 Cancer. *N Engl J Med* **387**, 573 (2022). <https://doi.org/10.1056/NEJMc2208623>
- 1223 58 Nagira, Y. *et al.* S-531011, a novel anti-human CCR8 antibody, induces potent anti-  
1224 tumor responses through depletion of tumor-infiltrating CCR8-expressing regulatory T  
1225 cells. *Mol Cancer Ther* (2023). <https://doi.org/10.1158/1535-7163.MCT-22-0570>
- 1226 59 Campbell, J. R. *et al.* Fc-Optimized Anti-CCR8 Antibody Depletes Regulatory T Cells  
1227 in Human Tumor Models. *Cancer Res* **81**, 2983-2994 (2021).  
1228 <https://doi.org/10.1158/0008-5472.CAN-20-3585>
- 1229 60 Lohr, J. *et al.* Effector T-cell infiltration positively impacts survival of glioblastoma  
1230 patients and is impaired by tumor-derived TGF-beta. *Clin Cancer Res* **17**, 4296-4308  
1231 (2011). <https://doi.org/10.1158/1078-0432.CCR-10-2557>
- 1232 61 Ali, H. R. *et al.* Association between CD8+ T-cell infiltration and breast cancer survival  
1233 in 12,439 patients. *Ann Oncol* **25**, 1536-1543 (2014).  
1234 <https://doi.org/10.1093/annonc/mdu191>
- 1235 62 Yang, Y. *et al.* High intratumoral CD8(+) T-cell infiltration is associated with improved  
1236 survival in prostate cancer patients undergoing radical prostatectomy. *Prostate* **81**, 20-  
1237 28 (2021). <https://doi.org/10.1002/pros.24068>
- 1238 63 Li, F. *et al.* The association between CD8+ tumor-infiltrating lymphocytes and the  
1239 clinical outcome of cancer immunotherapy: A systematic review and meta-analysis.  
1240 *EClinicalMedicine* **41**, 101134 (2021). <https://doi.org/10.1016/j.eclinm.2021.101134>
- 1241 64 Hulsen, S. *et al.* High Stroma T-Cell Infiltration is Associated with Better Survival in  
1242 Stage pT1 Bladder Cancer. *Int J Mol Sci* **21** (2020).  
1243 <https://doi.org/10.3390/ijms21218407>
- 1244 65 Combes, A. J. *et al.* Discovering dominant tumor immune archetypes in a pan-cancer  
1245 census. *Cell* **185**, 184-203 e119 (2022). <https://doi.org/10.1016/j.cell.2021.12.004>
- 1246 66 julian.knight@well.ox.ac.uk, C. O.-M.-o. B. A. C. E. a. & Consortium, C. O.-M.-o. B.  
1247 A. A blood atlas of COVID-19 defines hallmarks of disease severity and specificity.  
1248 *Cell* **185**, 916-938 e958 (2022). <https://doi.org/10.1016/j.cell.2022.01.012>
- 1249 67 McGinnis, C. S., Murrow, L. M. & Gartner, Z. J. DoubletFinder: Doublet Detection in  
1250 Single-Cell RNA Sequencing Data Using Artificial Nearest Neighbors. *Cell Syst* **8**,  
1251 329-337 e324 (2019). <https://doi.org/10.1016/j.cels.2019.03.003>
- 1252 68 Sun, B. *et al.* Double-jeopardy: scRNA-seq doublet/multiplet detection using multi-  
1253 omic profiling. *Cell Rep Methods* **1**, None (2021).  
1254 <https://doi.org/10.1016/j.crmeth.2021.100008>
- 1255 69 Leader, A. M. *et al.* Single-cell analysis of human non-small cell lung cancer lesions  
1256 refines tumor classification and patient stratification. *Cancer Cell* **39**, 1594-1609 e1512  
1257 (2021). <https://doi.org/10.1016/j.ccell.2021.10.009>

- 1258 70 de Andrade, L. F. *et al.* Discovery of specialized NK cell populations infiltrating human  
1259 melanoma metastases. *JCI Insight* **4** (2019). [https://doi.org:10.1172/jci.insight.133103](https://doi.org/10.1172/jci.insight.133103)
- 1260 71 Martin, J. C. *et al.* Single-Cell Analysis of Crohn's Disease Lesions Identifies a  
1261 Pathogenic Cellular Module Associated with Resistance to Anti-TNF Therapy. *Cell*  
1262 **178**, 1493-1508 e1420 (2019). [https://doi.org:10.1016/j.cell.2019.08.008](https://doi.org/10.1016/j.cell.2019.08.008)
- 1263 72 Watson, R. A. *et al.* Immune checkpoint blockade sensitivity and progression-free  
1264 survival associates with baseline CD8(+) T cell clone size and cytotoxicity. *Sci*  
1265 *Immunol* **6**, eabj8825 (2021). [https://doi.org:10.1126/sciimmunol.abj8825](https://doi.org/10.1126/sciimmunol.abj8825)
- 1266 73 Tickotsky, N., Sagiv, T., Prilusky, J., Shifrut, E. & Friedman, N. McPAS-TCR: a  
1267 manually curated catalogue of pathology-associated T cell receptor sequences.  
1268 *Bioinformatics* **33**, 2924-2929 (2017). [https://doi.org:10.1093/bioinformatics/btx286](https://doi.org/10.1093/bioinformatics/btx286)
- 1269 74 Chen, S. Y., Yue, T., Lei, Q. & Guo, A. Y. TCRdb: a comprehensive database for T-  
1270 cell receptor sequences with powerful search function. *Nucleic Acids Res* **49**, D468-  
1271 D474 (2021). [https://doi.org:10.1093/nar/gkaa796](https://doi.org/10.1093/nar/gkaa796)
- 1272 75 Robinson, M. D., McCarthy, D. J. & Smyth, G. K. edgeR: a Bioconductor package for  
1273 differential expression analysis of digital gene expression data. *Bioinformatics* **26**, 139-  
1274 140 (2010). [https://doi.org:10.1093/bioinformatics/btp616](https://doi.org/10.1093/bioinformatics/btp616)
- 1275 76 Law, C. W., Chen, Y., Shi, W. & Smyth, G. K. voom: Precision weights unlock linear  
1276 model analysis tools for RNA-seq read counts. *Genome Biol* **15**, R29 (2014).  
1277 [https://doi.org:10.1186/gb-2014-15-2-r29](https://doi.org/10.1186/gb-2014-15-2-r29)
- 1278 77 Chu, T., Wang, Z., Pe'er, D. & Danko, C. G. Cell type and gene expression  
1279 deconvolution with BayesPrism enables Bayesian integrative analysis across bulk and  
1280 single-cell RNA sequencing in oncology. *Nat Cancer* **3**, 505-517 (2022).  
1281 [https://doi.org:10.1038/s43018-022-00356-3](https://doi.org/10.1038/s43018-022-00356-3)  
1282
